# Supplementary material for: Three new indolyl diketopiperazine metabolites from the antarctic soil-derived fungus Penicillium sp. SCSIO 05705
Source: Royal Society of Chemistry journal article supplement (doi:10.1039/c5ra10828d), 2015-01-01
Supplement: c5ra10828d1.pdf [file c5ra10828d1.pdf]

**Junfeng Wang,<sup>a</sup> Weijun He,<sup>a,b</sup> Xiaochu Qin,<sup>c</sup> Xiaoyi Wei,<sup>d</sup> Xinpeng Tian,<sup>a</sup> Li Liao,<sup>e</sup> Shengrong Liao,<sup>a</sup> Bin Yang,<sup>a</sup> Zhengchao Tu,<sup>c</sup> Bo Chen,<sup>e</sup> Fazuo Wang,<sup>a</sup> Xiaojiang Zhou,<sup>b,\*</sup> and Yonghong Liu<sup>a,\*</sup>**

<sup>a</sup> CAS Key Laboratory of Tropical Marine Bio-resources and Ecology/Guangdong Key Laboratory of Marine Materia Medica/RNAM Center for Marine Microbiology, South China Sea Institute of Oceanology, Chinese Academy of Sciences, Guangzhou 510301, PR China;

<sup>b</sup> College of Pharmacy, Hunan University of Chinese Medicine, Changsha 410208, PR China;

<sup>c</sup> Guangzhou Institutes of Biomedicine and Health, Chinese Academy of Sciences, Guangzhou 510530, PR China;

<sup>d</sup> Key Laboratory of Plant Resources Conservation and Sustainable Utilization, South China Botanical Garden, Chinese Academy of Sciences, Guangzhou 510650, China

<sup>e</sup> SOA Key Laboratory for Polar Science, Polar Research Institute of China, Shanghai 200136, PR China;

\* Author to whom correspondence should be addressed; E-Mail: [yonghongliu@scsio.ac.cn](mailto:yonghongliu@scsio.ac.cn); Tel./Fax:

(+86)-020-8902-3244; [gale9888@163.com](mailto:gale9888@163.com), Tel: +86-731-8845-8234.

| <b>List of supporting information</b>                                                                                                   | <b>Page</b> |
|-----------------------------------------------------------------------------------------------------------------------------------------|-------------|
| <b>Table S1.</b> $^1\text{H}$ and $^{13}\text{C}$ NMR data for <b>2</b> and <b>3</b> in $\text{CD}_3\text{OD}$ .....                    | S4          |
| <b>Table S2.</b> Relative and free energies and equilibrium populations of low-energy conformers of <b>1</b> and <b>3</b> in MeOH. .... | S4          |
| <b>Figure S1.</b> Circular dichroism spectra of <b>1–3</b> .....                                                                        | S5          |
| <b>Figure S2.</b> Conformations of low-energy conformers of <b>1</b> and <b>3</b> .....                                                 | S5          |
| <b>Figure S3.</b> The $^1\text{H}$ NMR spectrum of penilline A ( <b>1</b> ) in $\text{DMSO-}d_6$ .....                                  | S6          |
| <b>Figure S4.</b> The $^{13}\text{C}$ NMR spectrum of penilline A ( <b>1</b> ) in $\text{DMSO-}d_6$ .....                               | S7          |
| <b>Figure S5.</b> The HMQC spectrum of penilline A ( <b>1</b> ) in $\text{DMSO-}d_6$ .....                                              | S8          |
| <b>Figure S6.</b> The $^1\text{H-}^1\text{H}$ COSY spectrum of penilline A ( <b>1</b> ) in $\text{DMSO-}d_6$ .....                      | S9          |
| <b>Figure S7.</b> The HMBC spectrum of penilline A ( <b>1</b> ) in $\text{DMSO-}d_6$ .....                                              | S10         |
| <b>Figure S8.</b> The NOESY spectrum of penilline A ( <b>1</b> ) in $\text{DMSO-}d_6$ .....                                             | S11         |
| <b>Figure S9.</b> The HRESIMS spectrum of penilline A ( <b>1</b> ).....                                                                 | S12         |
| <b>Figure S10.</b> The UV spectrum of penilline A ( <b>1</b> ).....                                                                     | S13         |
| <b>Figure S11.</b> The $^1\text{H}$ NMR spectrum of isopenilline A ( <b>2</b> ) in $\text{CD}_3\text{OD}$ .....                         | S14         |
| <b>Figure S12.</b> The $^{13}\text{C}$ NMR spectrum of isopenilline A ( <b>2</b> ) in $\text{CD}_3\text{OD}$ .....                      | S15         |
| <b>Figure S13.</b> The HMQC spectrum of isopenilline A ( <b>2</b> ) in $\text{CD}_3\text{OD}$ .....                                     | S16         |
| <b>Figure S14.</b> The $^1\text{H-}^1\text{H}$ COSY spectrum of isopenilline A ( <b>2</b> ) in $\text{CD}_3\text{OD}$ .....             | S17         |
| <b>Figure S15.</b> The HMBC spectrum of isopenilline A ( <b>2</b> ) in $\text{CD}_3\text{OD}$ .....                                     | S18         |
| <b>Figure S16.</b> The $^1\text{H}$ NMR spectrum of isopenilline A ( <b>2</b> ) in $\text{DMSO-}d_6$ .....                              | S19         |
| <b>Figure S17.</b> The $^{13}\text{C}$ NMR spectrum of isopenilline A ( <b>2</b> ) in $\text{DMSO-}d_6$ .....                           | S20         |
| <b>Figure S18.</b> The HMQC spectrum of isopenilline A ( <b>2</b> ) in $\text{DMSO-}d_6$ .....                                          | S21         |
| <b>Figure S19.</b> The $^1\text{H-}^1\text{H}$ COSY spectrum of isopenilline A ( <b>2</b> ) in $\text{DMSO-}d_6$ .....                  | S22         |
| <b>Figure S20.</b> The HMBC spectrum of isopenilline A ( <b>2</b> ) in $\text{DMSO-}d_6$ .....                                          | S23         |
| <b>Figure S21.</b> The NOESY spectrum of isopenilline A ( <b>2</b> ) in $\text{DMSO-}d_6$ .....                                         | S24         |
| <b>Figure S22.</b> The HRESIMS spectrum of isopenilline A ( <b>2</b> ).....                                                             | S25         |
| <b>Figure S23.</b> The UV spectrum of isopenilline A ( <b>2</b> ).....                                                                  | S26         |
| <b>Figure S24.</b> The $^1\text{H}$ NMR spectrum of penilline B ( <b>3</b> ) in $\text{CD}_3\text{OD}$ .....                            | S27         |

|                                                                                                                              |     |
|------------------------------------------------------------------------------------------------------------------------------|-----|
| <b>Figure S25.</b> The $^{13}\text{C}$ NMR spectrum of penilline B ( <b>3</b> ) in $\text{CD}_3\text{OD}$ .....              | S28 |
| <b>Figure S26.</b> The HMQC spectrum of penilline B ( <b>3</b> ) in $\text{CD}_3\text{OD}$ .....                             | S29 |
| <b>Figure S27.</b> The $^1\text{H}$ - $^1\text{H}$ COSY spectrum of penilline B ( <b>3</b> ) in $\text{CD}_3\text{OD}$ ..... | S30 |
| <b>Figure S28.</b> The HMBC spectrum of penilline B ( <b>3</b> ) in $\text{CD}_3\text{OD}$ .....                             | S31 |
| <b>Figure S29.</b> The $^1\text{H}$ NMR spectrum of penilline B ( <b>3</b> ) in $\text{DMSO-}d_6$ .....                      | S32 |
| <b>Figure S30.</b> The $^{13}\text{C}$ NMR spectrum of penilline B ( <b>3</b> ) in $\text{DMSO-}d_6$ .....                   | S33 |
| <b>Figure S31.</b> The HMQC spectrum of penilline B ( <b>3</b> ) in $\text{DMSO-}d_6$ .....                                  | S34 |
| <b>Figure S32.</b> The $^1\text{H}$ - $^1\text{H}$ COSY spectrum of penilline B ( <b>3</b> ) in $\text{DMSO-}d_6$ .....      | S35 |
| <b>Figure S33.</b> The HMBC spectrum of penilline B ( <b>3</b> ) in $\text{DMSO-}d_6$ .....                                  | S36 |
| <b>Figure S34.</b> The NOESY spectrum of penilline B ( <b>3</b> ) in $\text{DMSO-}d_6$ .....                                 | S37 |
| <b>Figure S35.</b> The HRESIMS spectrum of penilline B ( <b>3</b> ).....                                                     | S38 |
| <b>Figure S36.</b> The UV spectrum of penilline B ( <b>3</b> ).....                                                          | S39 |

**Table S1.**  $^1\text{H}$  and  $^{13}\text{C}$  NMR Data for **2** and **3** (500, 125 MHz,  $\text{CD}_3\text{OD}$ , TMS,  $\delta$  ppm).

| No. | <b>2</b>             |                                               | <b>3</b>             |                                               |
|-----|----------------------|-----------------------------------------------|----------------------|-----------------------------------------------|
|     | $\delta_{\text{C}}$  | $\delta_{\text{H}}$ ( <i>J</i> in Hz)         | $\delta_{\text{C}}$  | $\delta_{\text{H}}$ ( <i>J</i> in Hz)         |
| 2   | 175.3, C             |                                               | 182.5, C             |                                               |
| 3   | 56.8, C              |                                               | 57.2, C              |                                               |
| 4   | 127.2, CH            | 7.30, d (7.8)                                 | 129.4, CH            | 7.14, d (7.6)                                 |
| 5   | 123.5, CH            | 7.07, t (7.5)                                 | 122.1, CH            | 6.94, t (7.5)                                 |
| 6   | 130.0, CH            | 7.32, t (7.5)                                 | 130.0, CH            | 7.01, t (7.5)                                 |
| 7   | 108.6, CH            | 7.04, d (7.8)                                 | 110.4, CH            | 6.44, d (7.6)                                 |
| 8   | 144.7, C             |                                               | 144.5, C             |                                               |
| 9   | 126.4, C             |                                               | 128.4, C             |                                               |
| 10  | 37.6, $\text{CH}_2$  | 2.74, dd (14.5, 2.0);<br>2.49, dd (14.5, 9.0) | 34.9, $\text{CH}_2$  | 2.80, dd (14.9, 1.7);<br>2.65, dd (14.9, 7.2) |
| 11  | 54.5, CH             | 3.52, m                                       | 55.1, CH             | 4.20, dd (7.2, 1.7)                           |
| 12  |                      |                                               |                      |                                               |
| 13  | 161.8, C             |                                               | 160.4, C             |                                               |
| 14  | 124.8, C             |                                               | 128.1, C             |                                               |
| 15  |                      |                                               |                      |                                               |
| 16  | 166.9, C             |                                               | 168.0, C             |                                               |
| 17  | 107.6, CH            | 6.57, s                                       | 104.6, CH            | 5.70, s                                       |
| 18  | 138.0, C             |                                               | 129.8, C             |                                               |
| 20  | 137.3, CH            | 7.72, s                                       | 134.3, CH            | 8.75, s                                       |
| 22  | 120.1, CH            | 7.30, s                                       | 121.7, CH            | 7.64, s                                       |
| 23  | 43.7, C              |                                               | 43.5, C              |                                               |
| 24  | 143.9, CH            | 6.02, dd (17.4, 10.9)                         | 144.1, CH            | 6.00, dd (17.4, 10.9)                         |
| 25  | 114.9, $\text{CH}_2$ | 5.08, d (10.9);<br>4.99, d (17.4)             | 114.6, $\text{CH}_2$ | 5.06, d (10.9);<br>4.97, d (17.4)             |
| 26  | 22.6, $\text{CH}_3$  | 1.08, s                                       | 22.3, $\text{CH}_3$  | 1.06, s                                       |
| 27  | 22.2, $\text{CH}_3$  | 0.99, s                                       | 21.9, $\text{CH}_3$  | 0.94, s                                       |

**Table S2.** Relative and free energies<sup>a</sup> and equilibrium populations<sup>b</sup> of low-energy conformers of **1** and **3** in MeOH.

| conformer                             | $\Delta E$ | $\Delta G$ | P (%) |
|---------------------------------------|------------|------------|-------|
| <b>Compound 1</b>                     |            |            |       |
| (3 <i>R</i> ,10 <i>S</i> )- <b>1a</b> | 0.19       | 0.00       | 84.4  |
| (3 <i>R</i> ,10 <i>S</i> )- <b>1b</b> | 1.26       | 1.38       | 8.2   |
| (3 <i>R</i> ,10 <i>S</i> )- <b>1c</b> | 2.22       | 1.77       | 4.2   |
| (3 <i>R</i> ,10 <i>S</i> )- <b>1d</b> | 0.0        | 1.97       | 3.0   |

|                                                    |      |      |      |
|----------------------------------------------------|------|------|------|
| (3 <i>R</i> ,10 <i>S</i> )- <b>1e</b> <sup>c</sup> | 2.70 | 3.49 | 0.2  |
| <b>Compound 3</b>                                  |      |      |      |
| (3 <i>R</i> ,10 <i>S</i> )- <b>3a</b>              | 0.00 | 0.00 | 46.5 |
| (3 <i>R</i> ,10 <i>S</i> )- <b>3b</b>              | 0.71 | 0.01 | 46.0 |
| (3 <i>R</i> ,10 <i>S</i> )- <b>3c</b>              | 1.04 | 1.42 | 4.2  |
| (3 <i>R</i> ,10 <i>S</i> )- <b>3d</b>              | 2.10 | 1.97 | 1.7  |
| (3 <i>R</i> ,10 <i>S</i> )- <b>3e</b> <sup>c</sup> | 2.55 | 2.18 | 1.2  |
| (3 <i>R</i> ,10 <i>S</i> )- <b>3f</b> <sup>c</sup> | 2.88 | 2.96 | 0.3  |

<sup>a</sup> At the B3LYP/def2-TZVP level, in kcal/mol. <sup>b</sup> From  $\Delta G$  values at 298.15 K. <sup>c</sup> Conformer not used for ECD/TDDFT calculations.

**Figure S1.** Circular dichroism spectra of **1–3**.

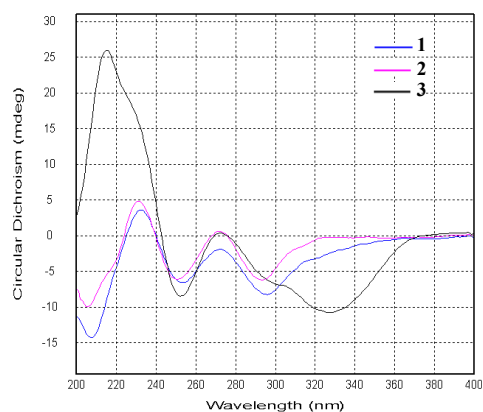

**Figure S2.** Conformations of low-energy conformers of **1** and **3**.

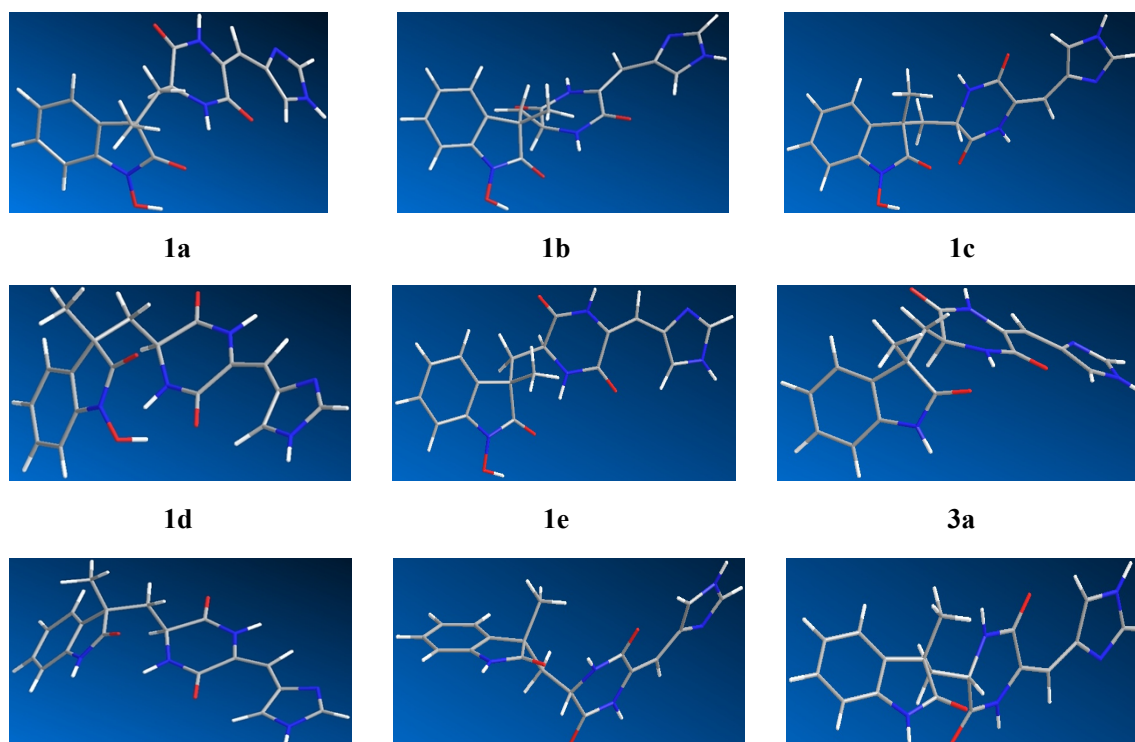

**3b**

**3c**

**3d**

**Figure S3.** The  $^1\text{H}$  NMR spectrum of penilline A (**1**) in  $\text{DMSO-}d_6$

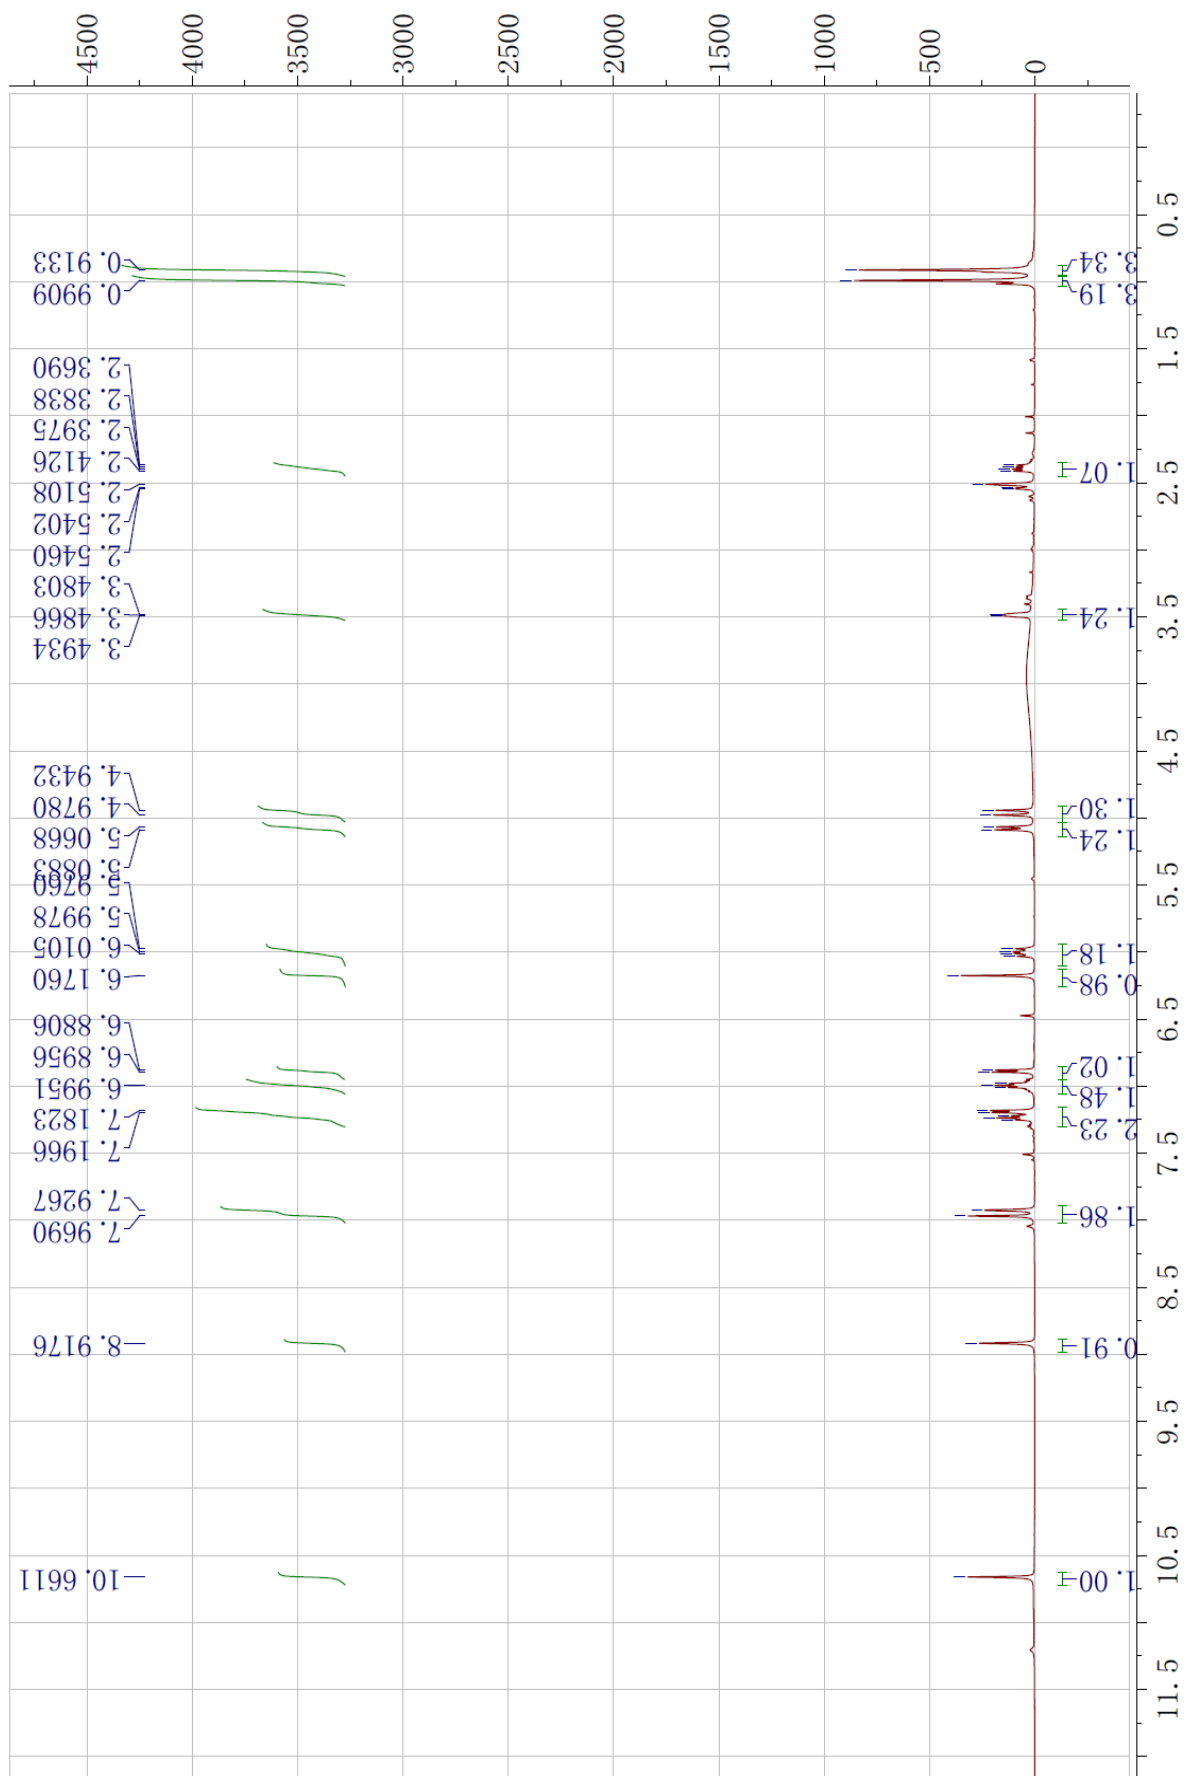

**Figure S4.** The  $^{13}\text{C}$  NMR spectrum of penilline A (1) in  $\text{DMSO-}d_6$

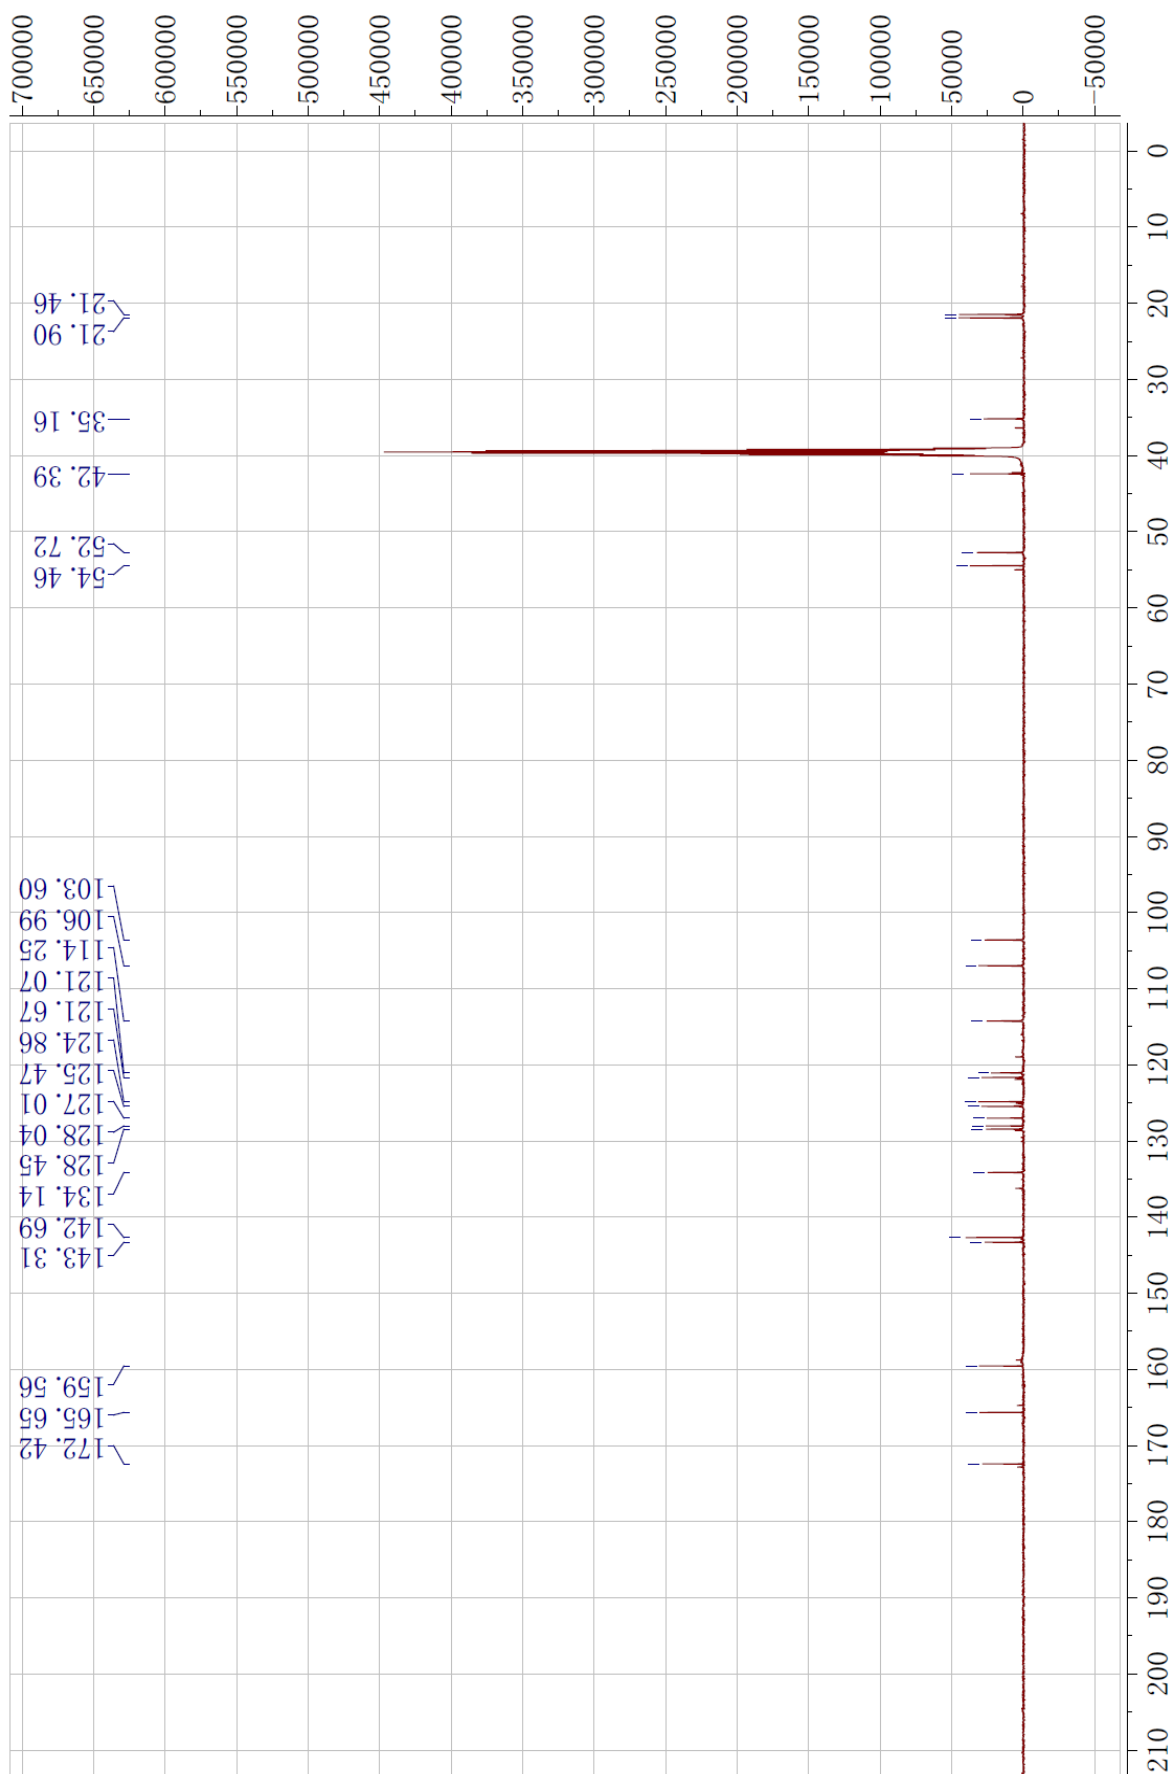

**Figure S5.** The HMQC spectrum of penilline A (**1**) in  $\text{DMSO-}d_6$



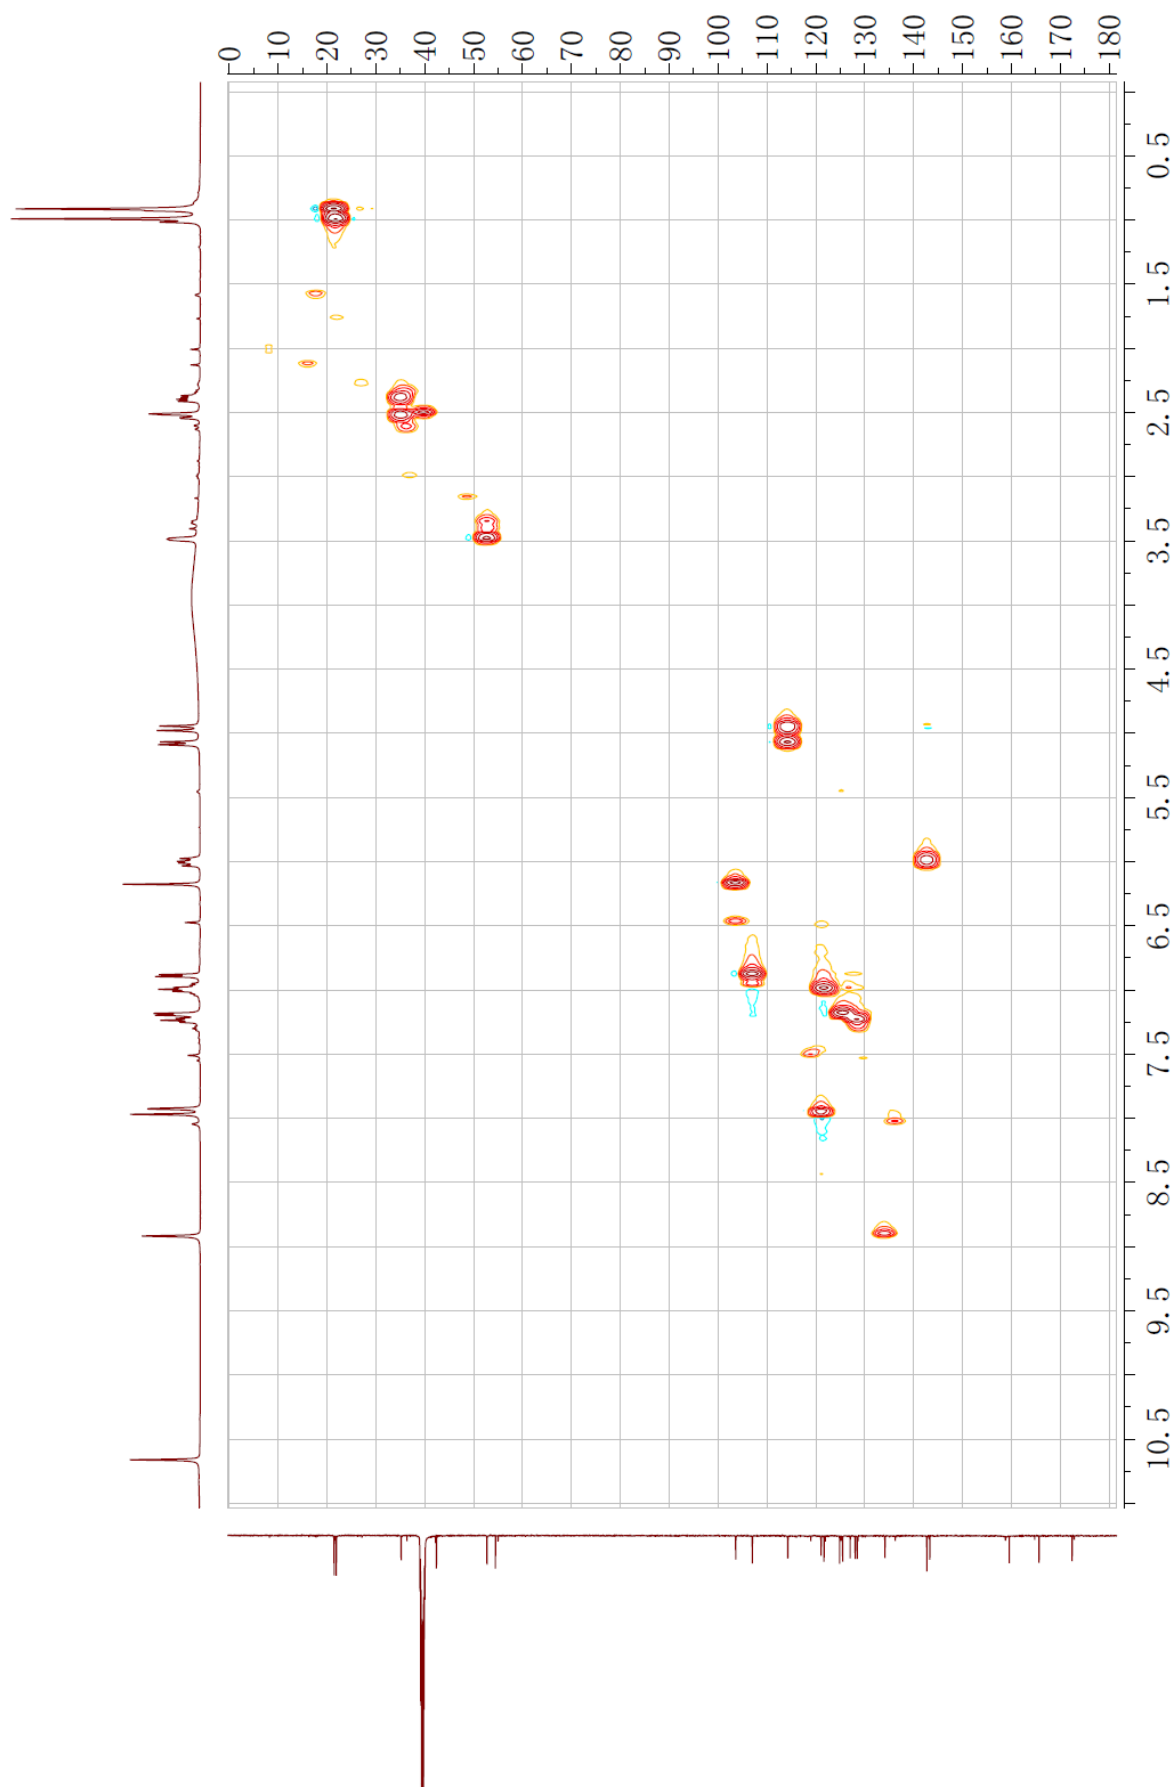

**Figure S6.** The  $^1\text{H}$ - $^1\text{H}$  COSY spectrum of penilline A (1) in  $\text{DMSO-}d_6$

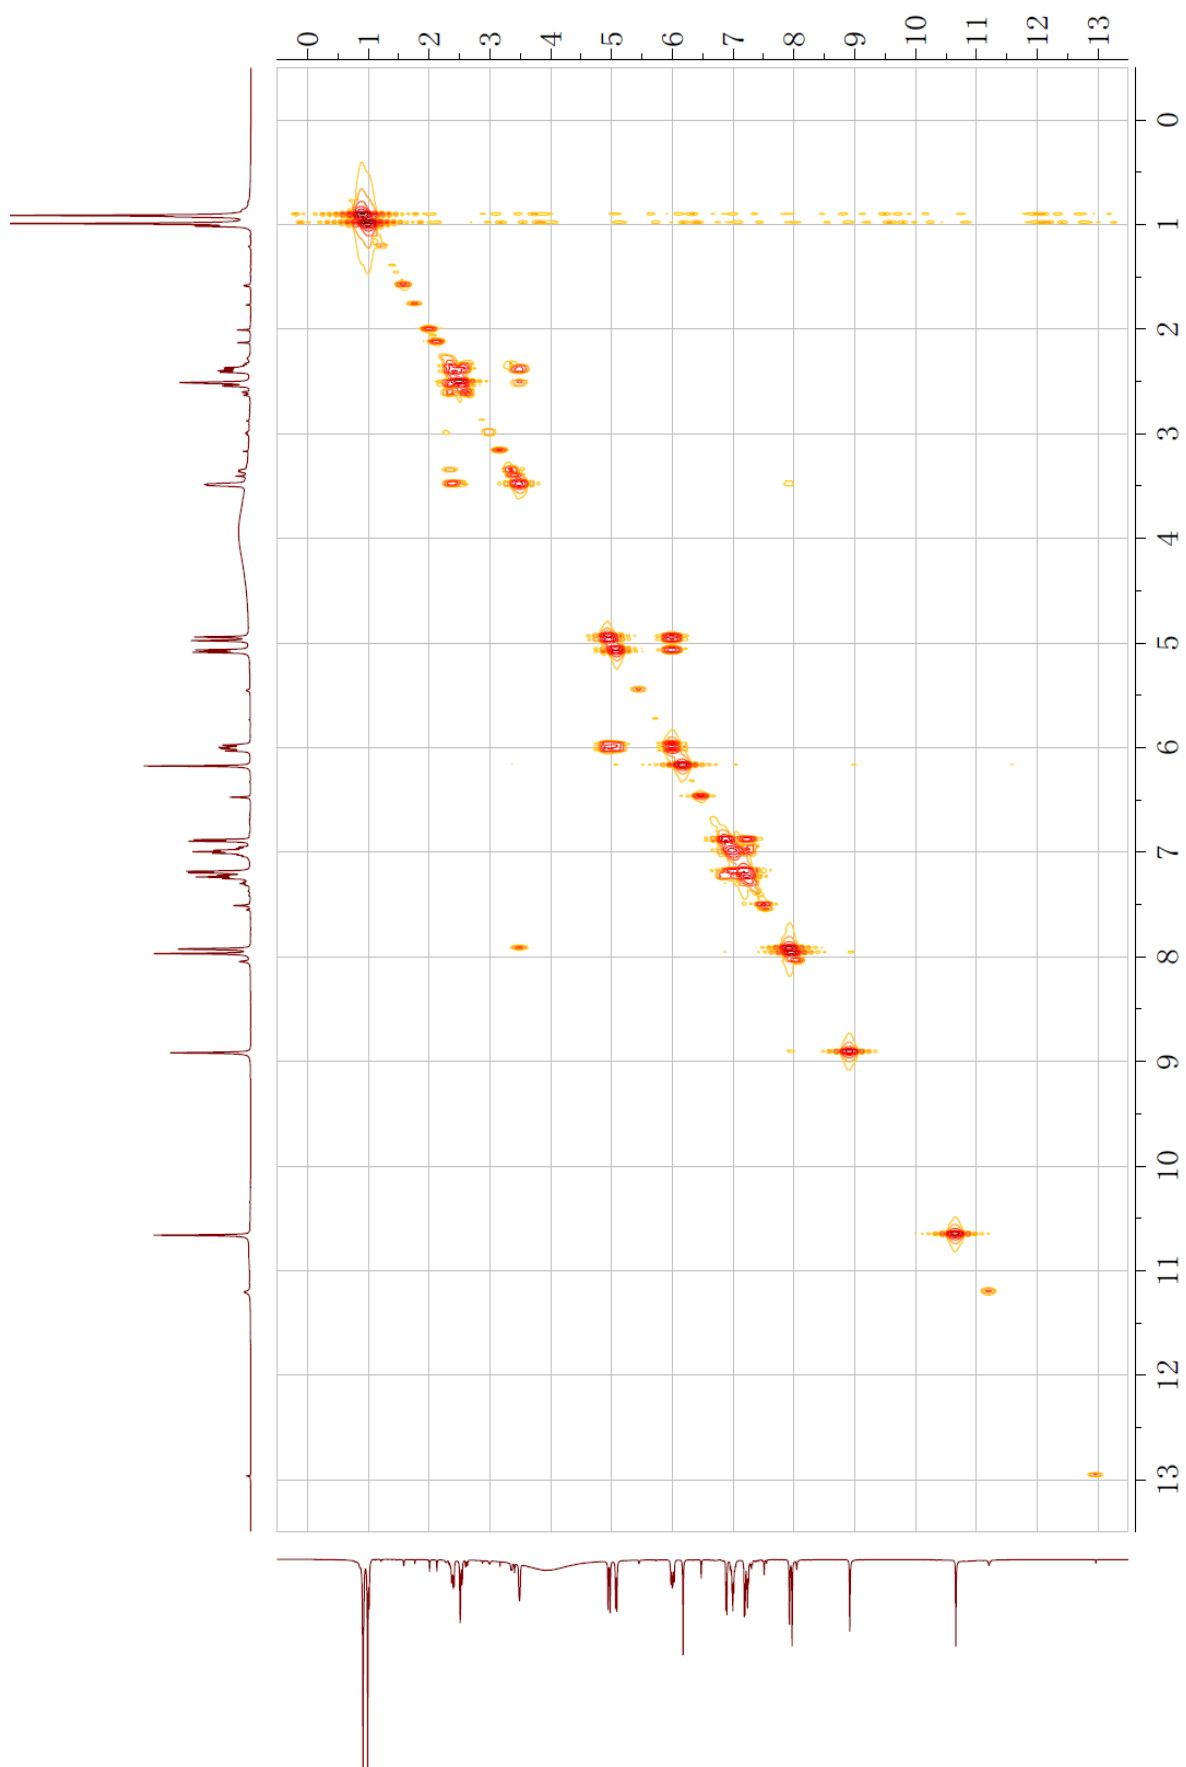

**Figure S7.** The HMBC spectrum of penilline A (1) in DMSO-*d*<sub>6</sub>

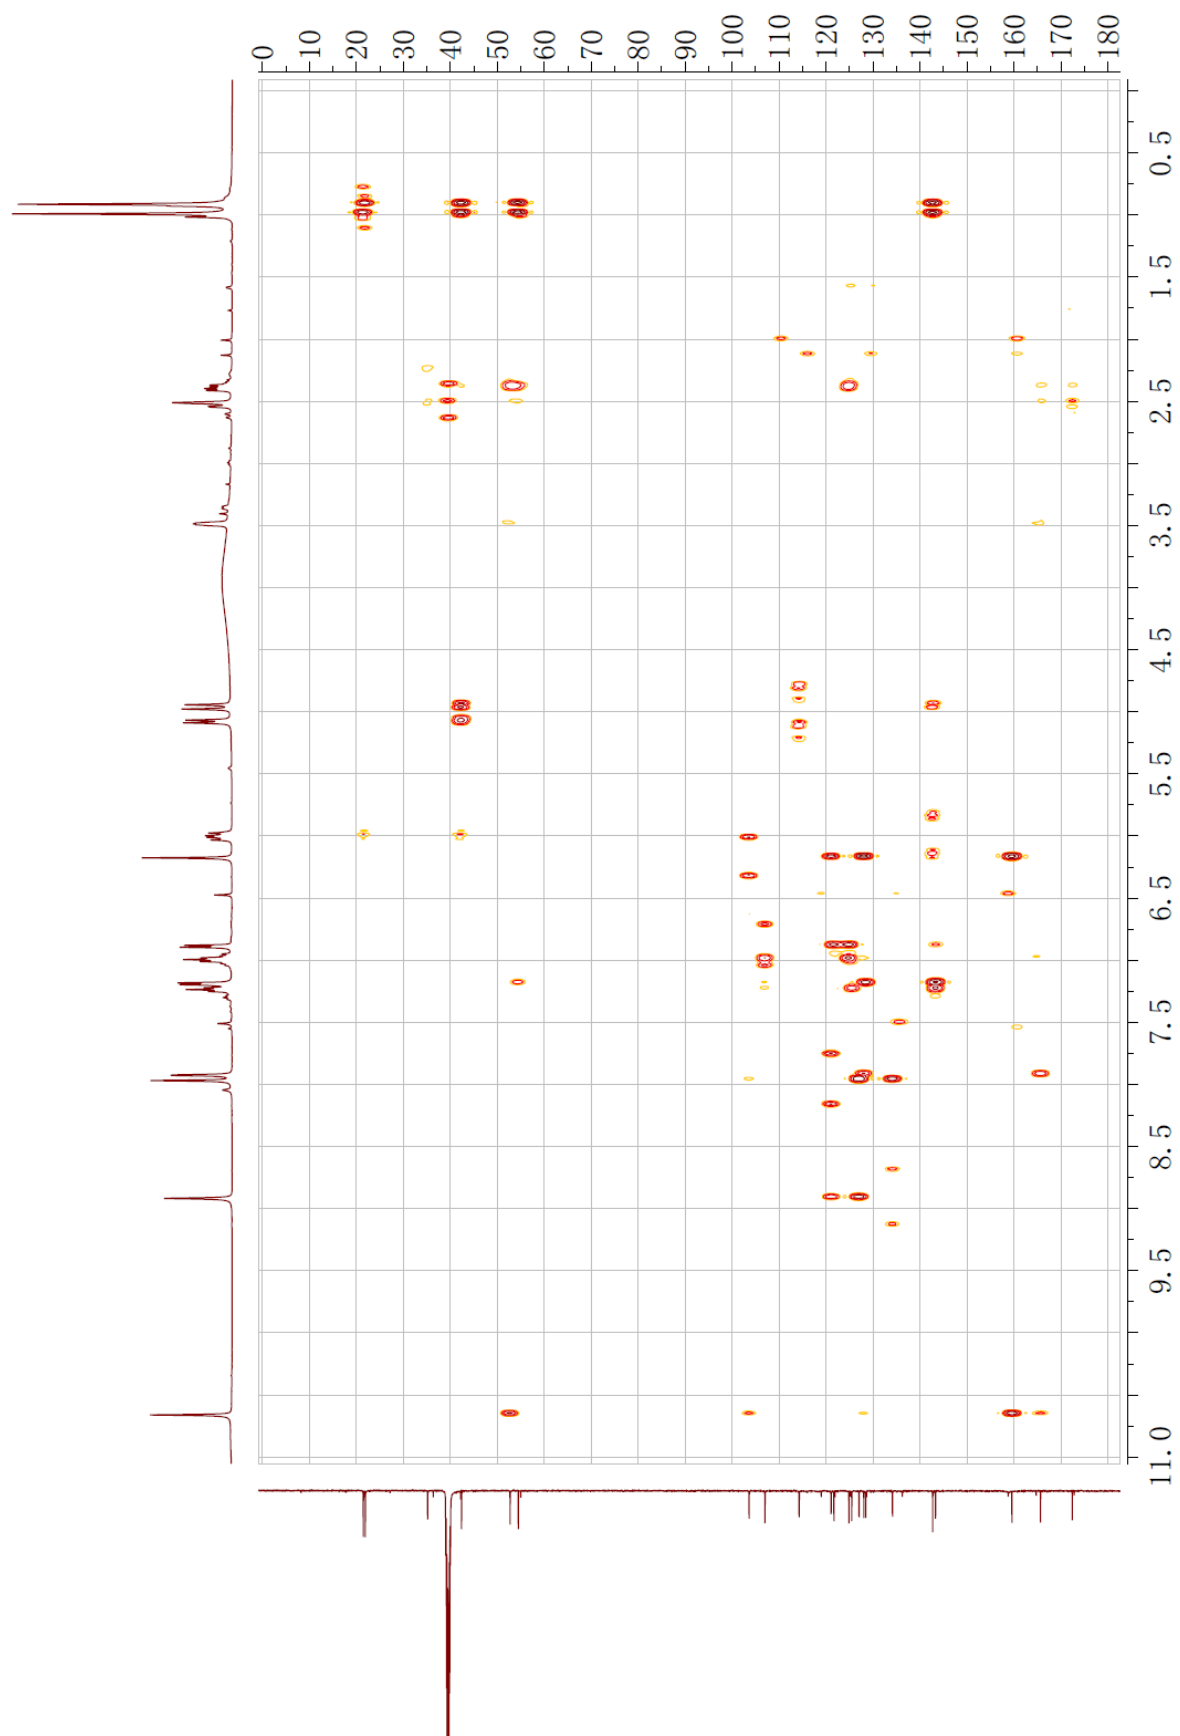

**Figure S8.** The NOESY spectrum of penilline A (**1**) in DMSO-*d*<sub>6</sub>

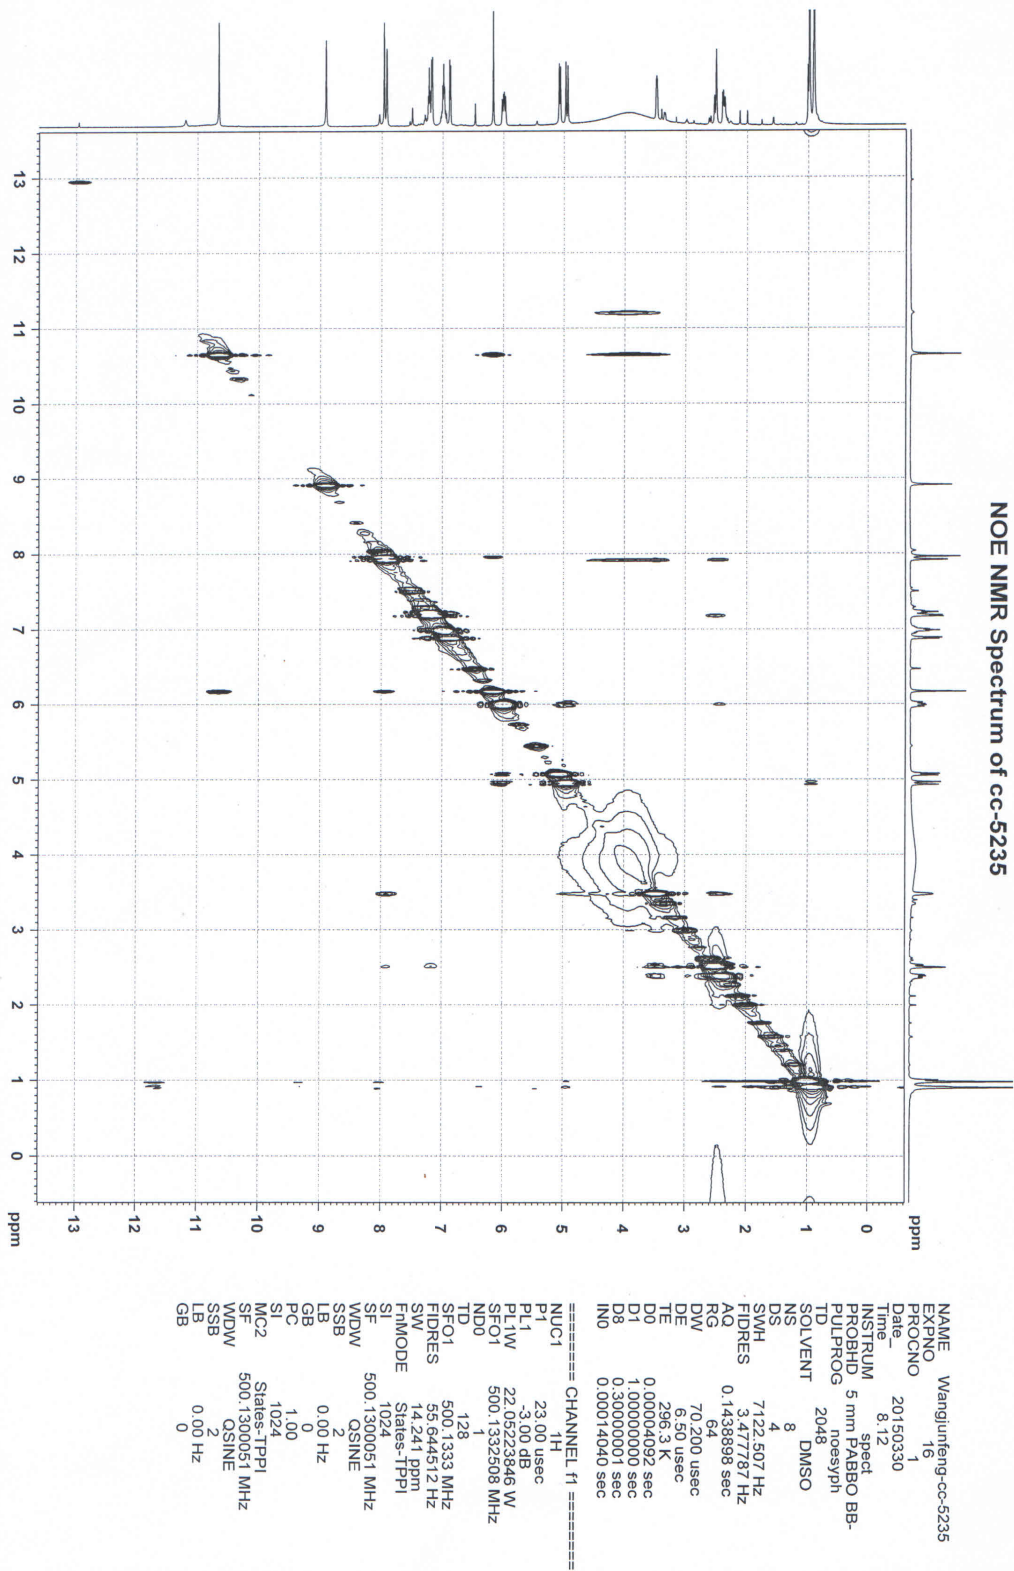

**Figure S9.** The HRESIMS spectrum of penilline A (**1**)

# Mass Spectrum SmartFormula Report

**Analysis Info**  
Analysis Name: D:\Data\MS\data\201503\wangjunteng\_CC-5221\_neg.d  
Method: POS\_100-2000\_Direct Infusion.m  
Sample Name: SCSIO  
Comment:  
Acquisition Date: 3/26/2015 11:10:05 AM  
Operator: SCSIO  
Instrument / Ser#: maxis  
29

**Acquisition Parameter**  
Source Type: ESI  
Focus: Not active  
Scan Begin: 100 m/z  
Scan End: 2000 m/z  
Ion Polarity: Negative  
Set Capillary: 3500 V  
Set End Plate Offset: -500 V  
Set Collision Cell RF: 2000.0 Vpp  
Set Nebulizer: 0.3 Bar  
Set Dry Heater: 180 °C  
Set Dry Gas: 2.0 l/min  
Set Divert Valve: Waste

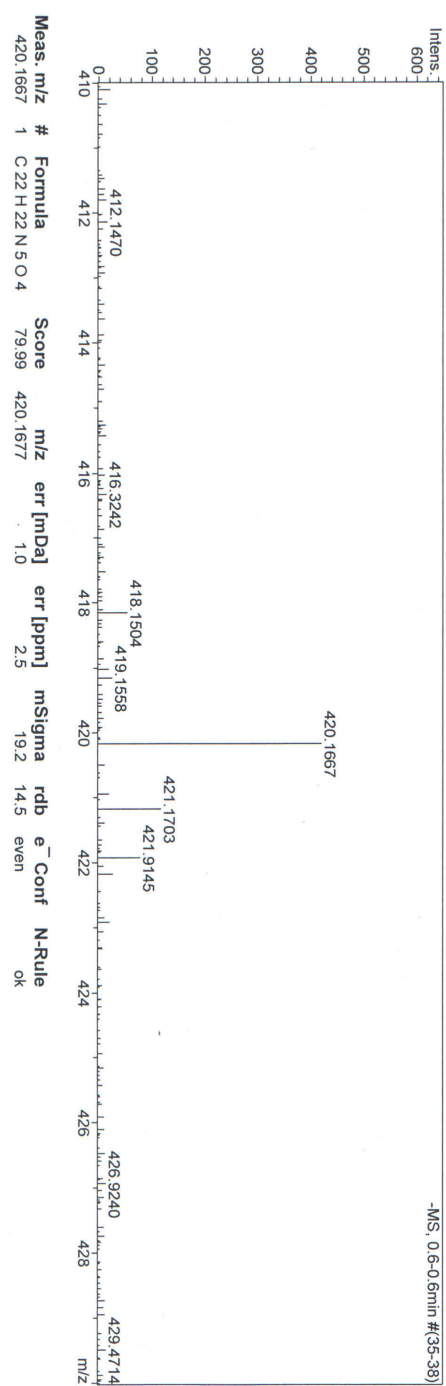

Figure S10. The UV spectrum of penilline A (1)

# 光谱峰值检测报告

2015-04-30 15:35:16

数据集: CC-5235 - RawData

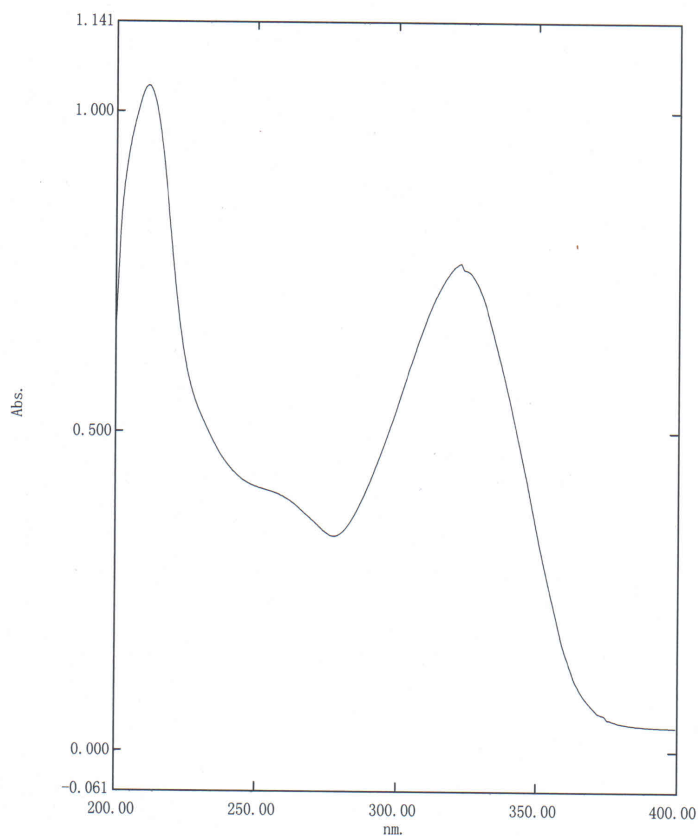

[测定属性]  
 波长范围 (nm.): 200.00 到 400.00  
 扫描速度: 中速  
 采样间隔: 0.2  
 自动采样间隔: 启用  
 扫描模式: 单个

[仪器属性]  
 仪器类型: UV-2600 系列  
 测定方式: 吸收值  
 狭缝宽: 2.0  
 积分时间: 0.1 秒  
 光源转换波长: 323.0 nm  
 检测器单元: 直接  
 S/R 转换: 标准  
 阶梯校正: OFF

[附件属性]  
 附件: 无

[数据处理参数]  
 阈值: 0.0100000  
 点: 4  
 内插: 停用  
 平均: 停用

[样品准备属性]  
 重量:  
 体积:  
 稀释:  
 光程长:  
 附加信息:

| No. | P/V | 波长 (nm) | 吸收值   | 描述 |
|-----|-----|---------|-------|----|
| 1   | ⬆   | 322.60  | 0.764 |    |
| 2   | ⬆   | 211.60  | 1.040 |    |
| 3   | ⬇   | 277.60  | 0.337 |    |

Figure S11. The <sup>1</sup>H NMR spectrum of isopenilline A (2) in CD<sub>3</sub>OD

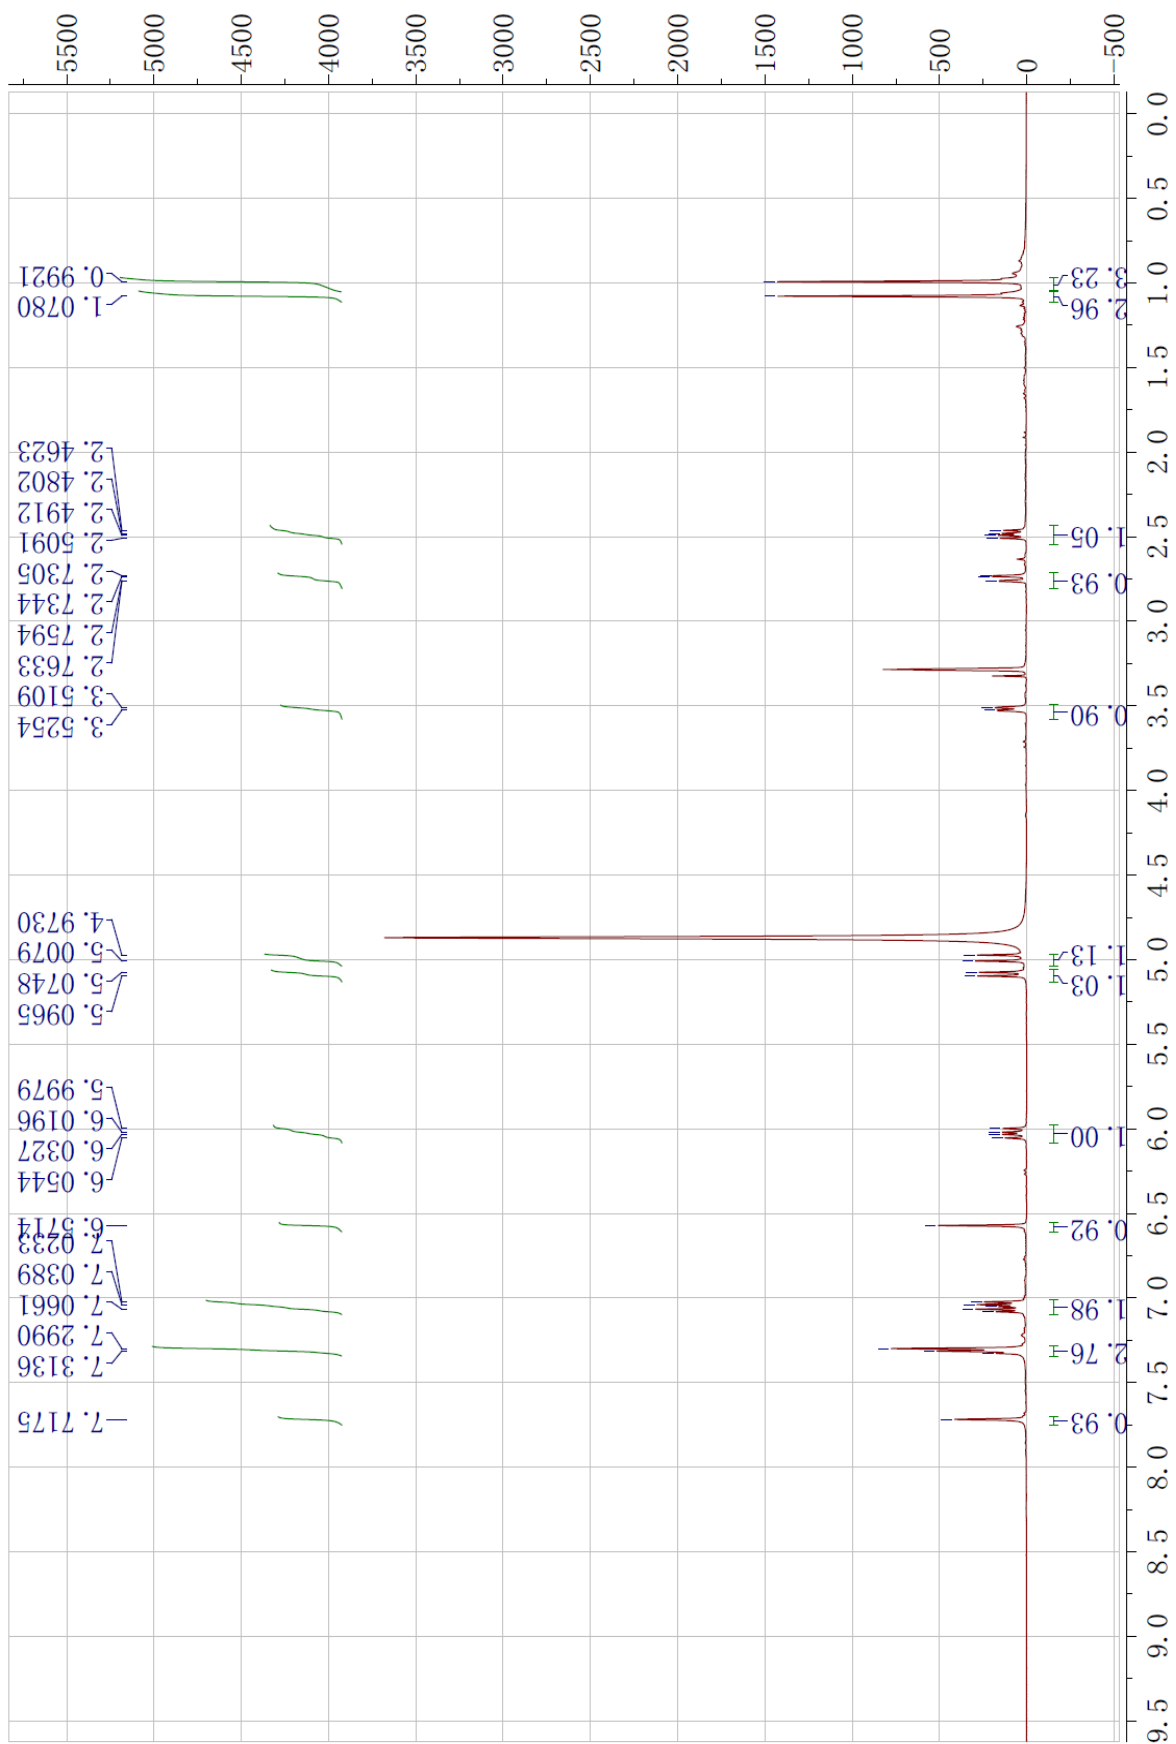

**Figure S12.** The  $^{13}\text{C}$  NMR spectrum of isopenilline A (2) in  $\text{CD}_3\text{OD}$

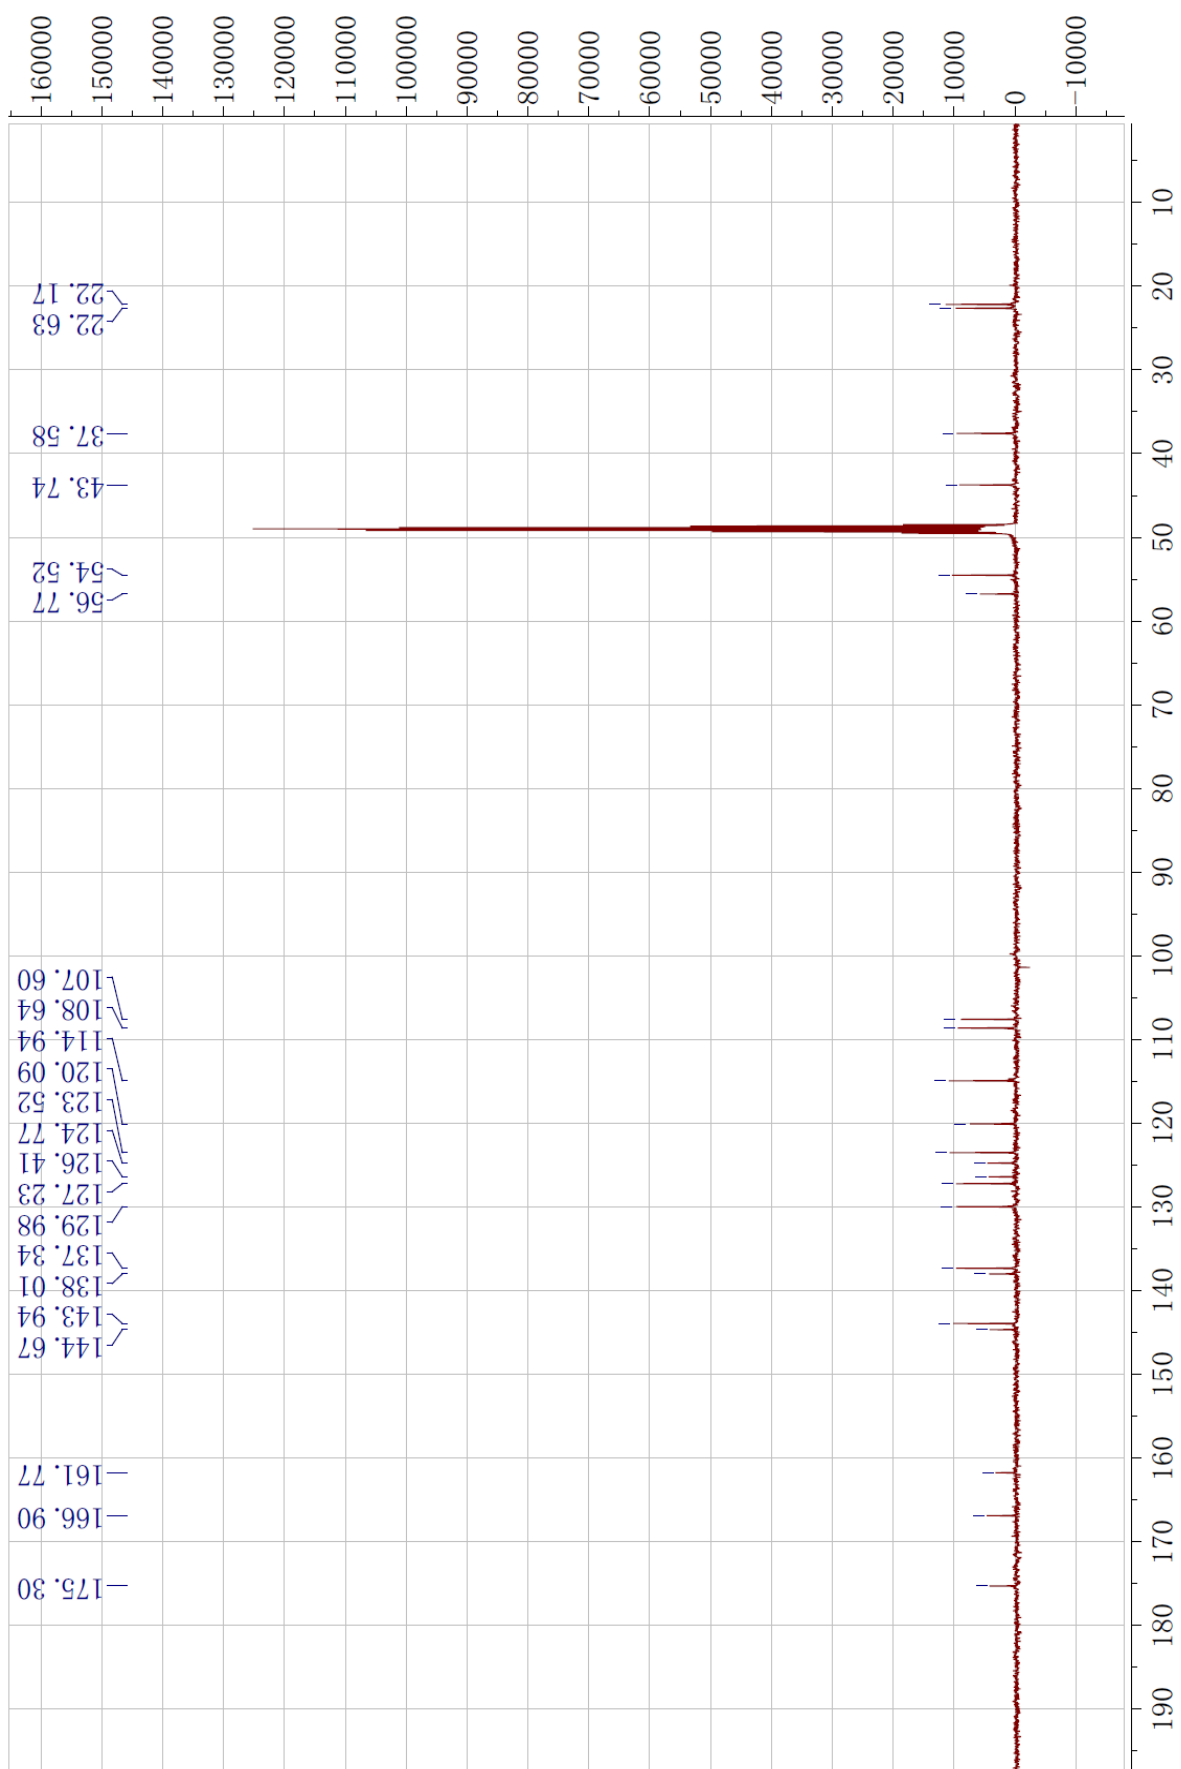

**Figure S13.** The HMQC spectrum of isopenilline A (**2**) in  $\text{CD}_3\text{OD}$



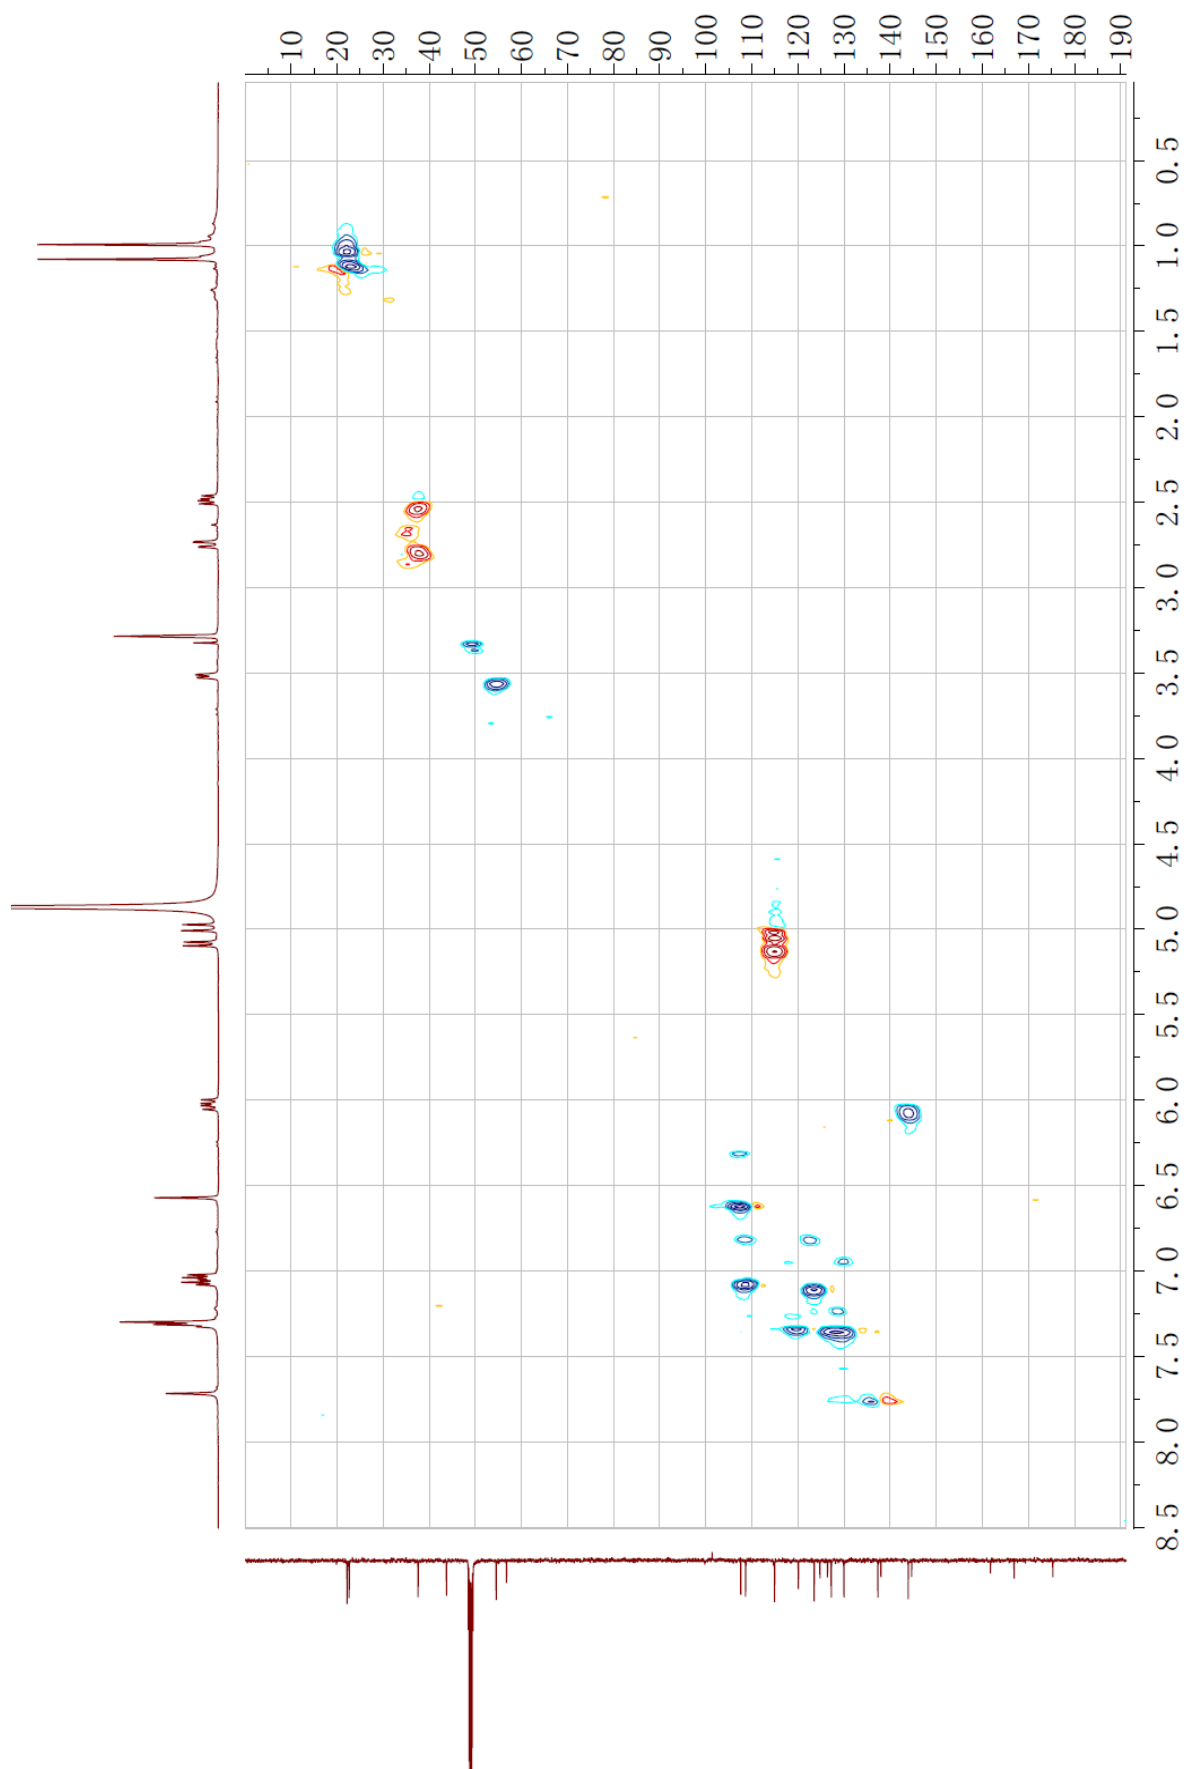

**Figure S14.** The  $^1\text{H}$ - $^1\text{H}$  COSY spectrum of isopenilline A (2) in  $\text{CD}_3\text{OD}$

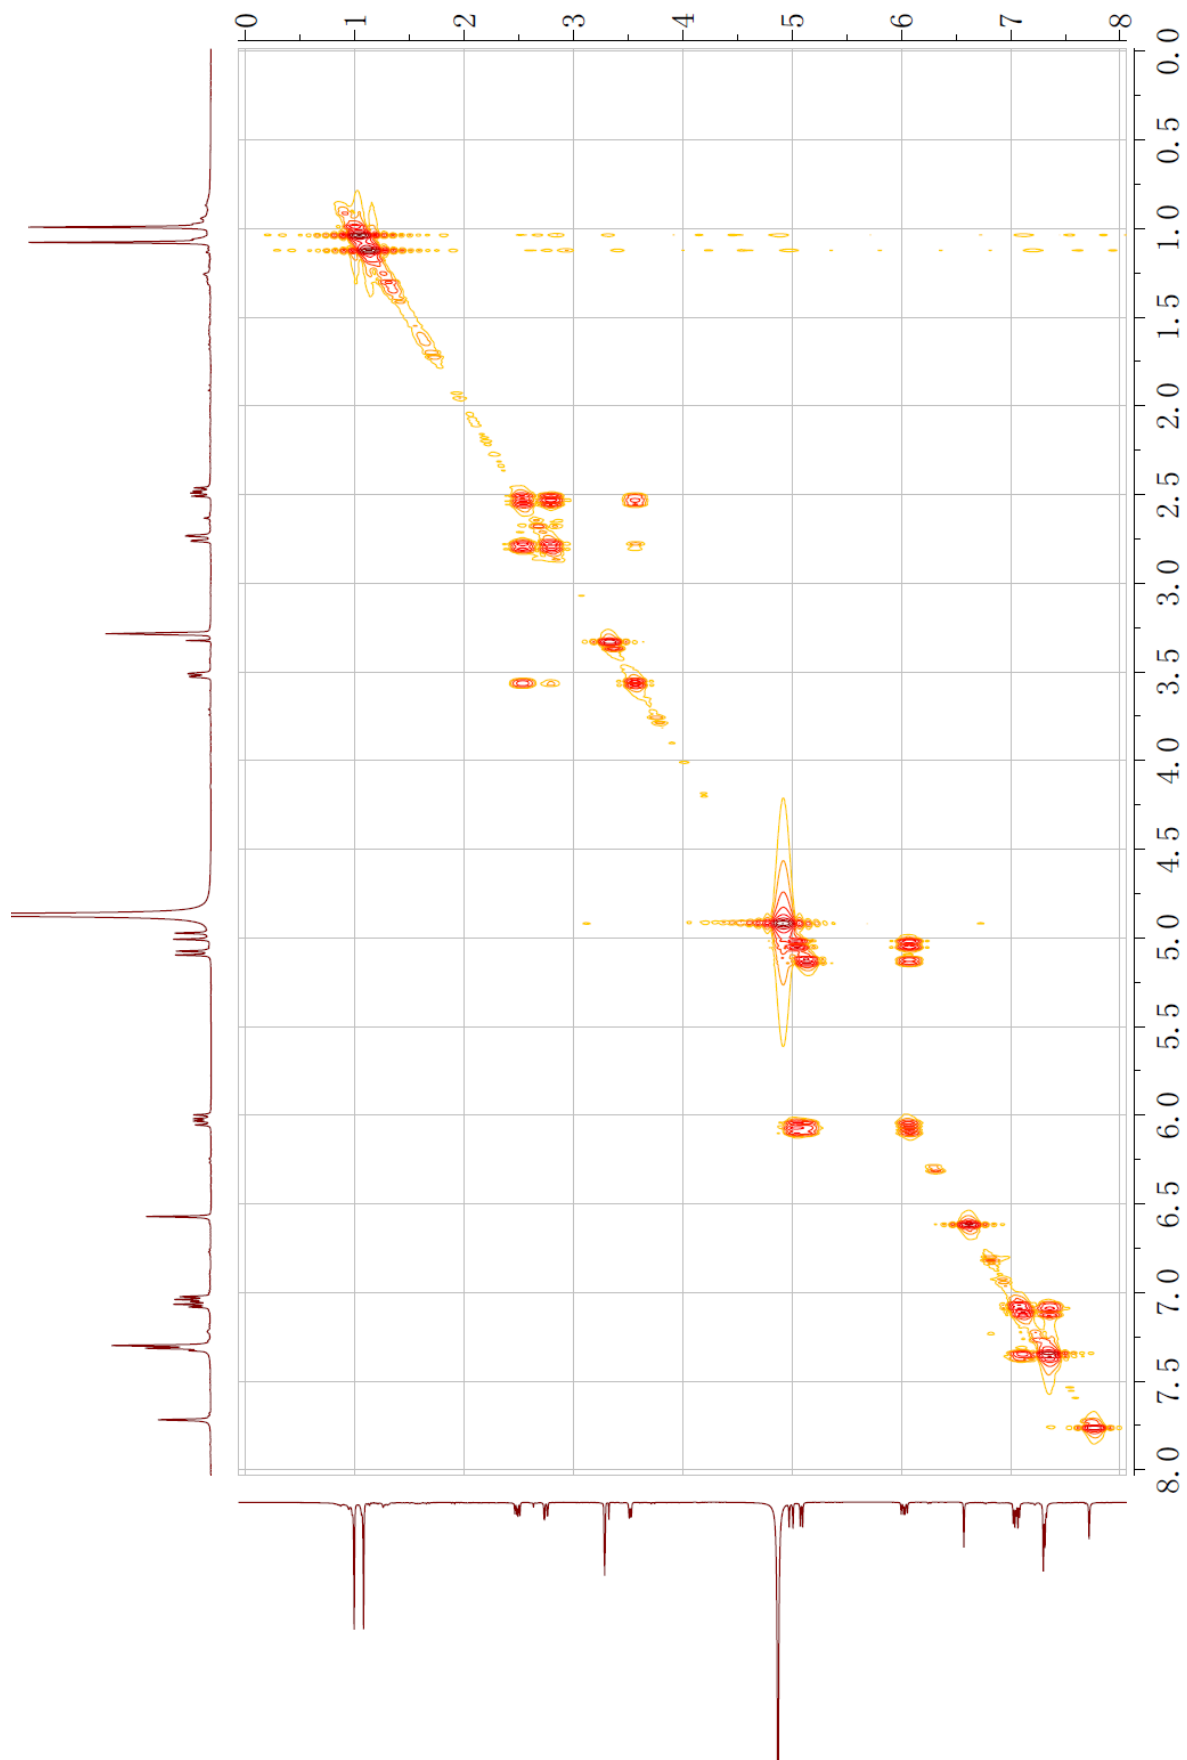

**Figure S15.** The HMBC spectrum of isopenilline A (2) in CD<sub>3</sub>OD

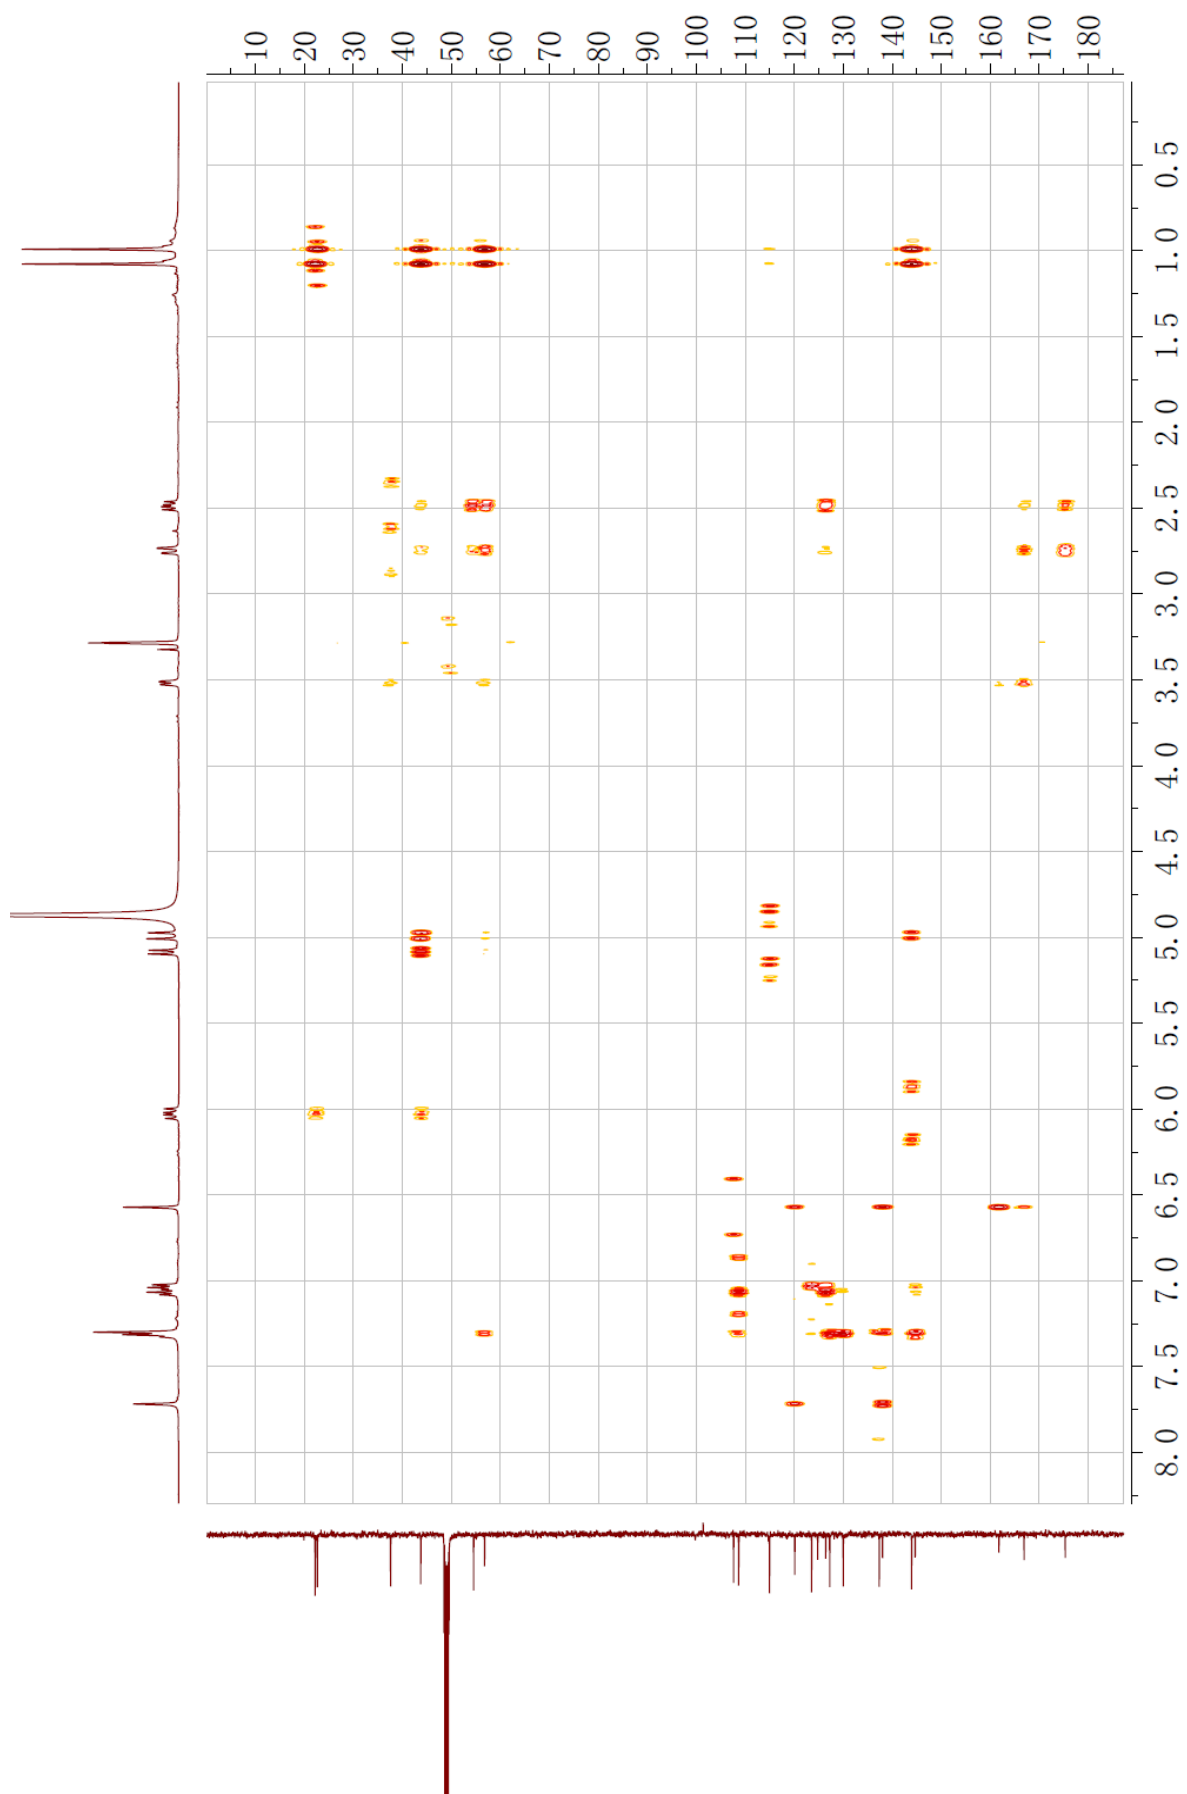

**Figure S16.** The  $^1\text{H}$  NMR spectrum of isopenilline A (2) in  $\text{DMSO-}d_6$

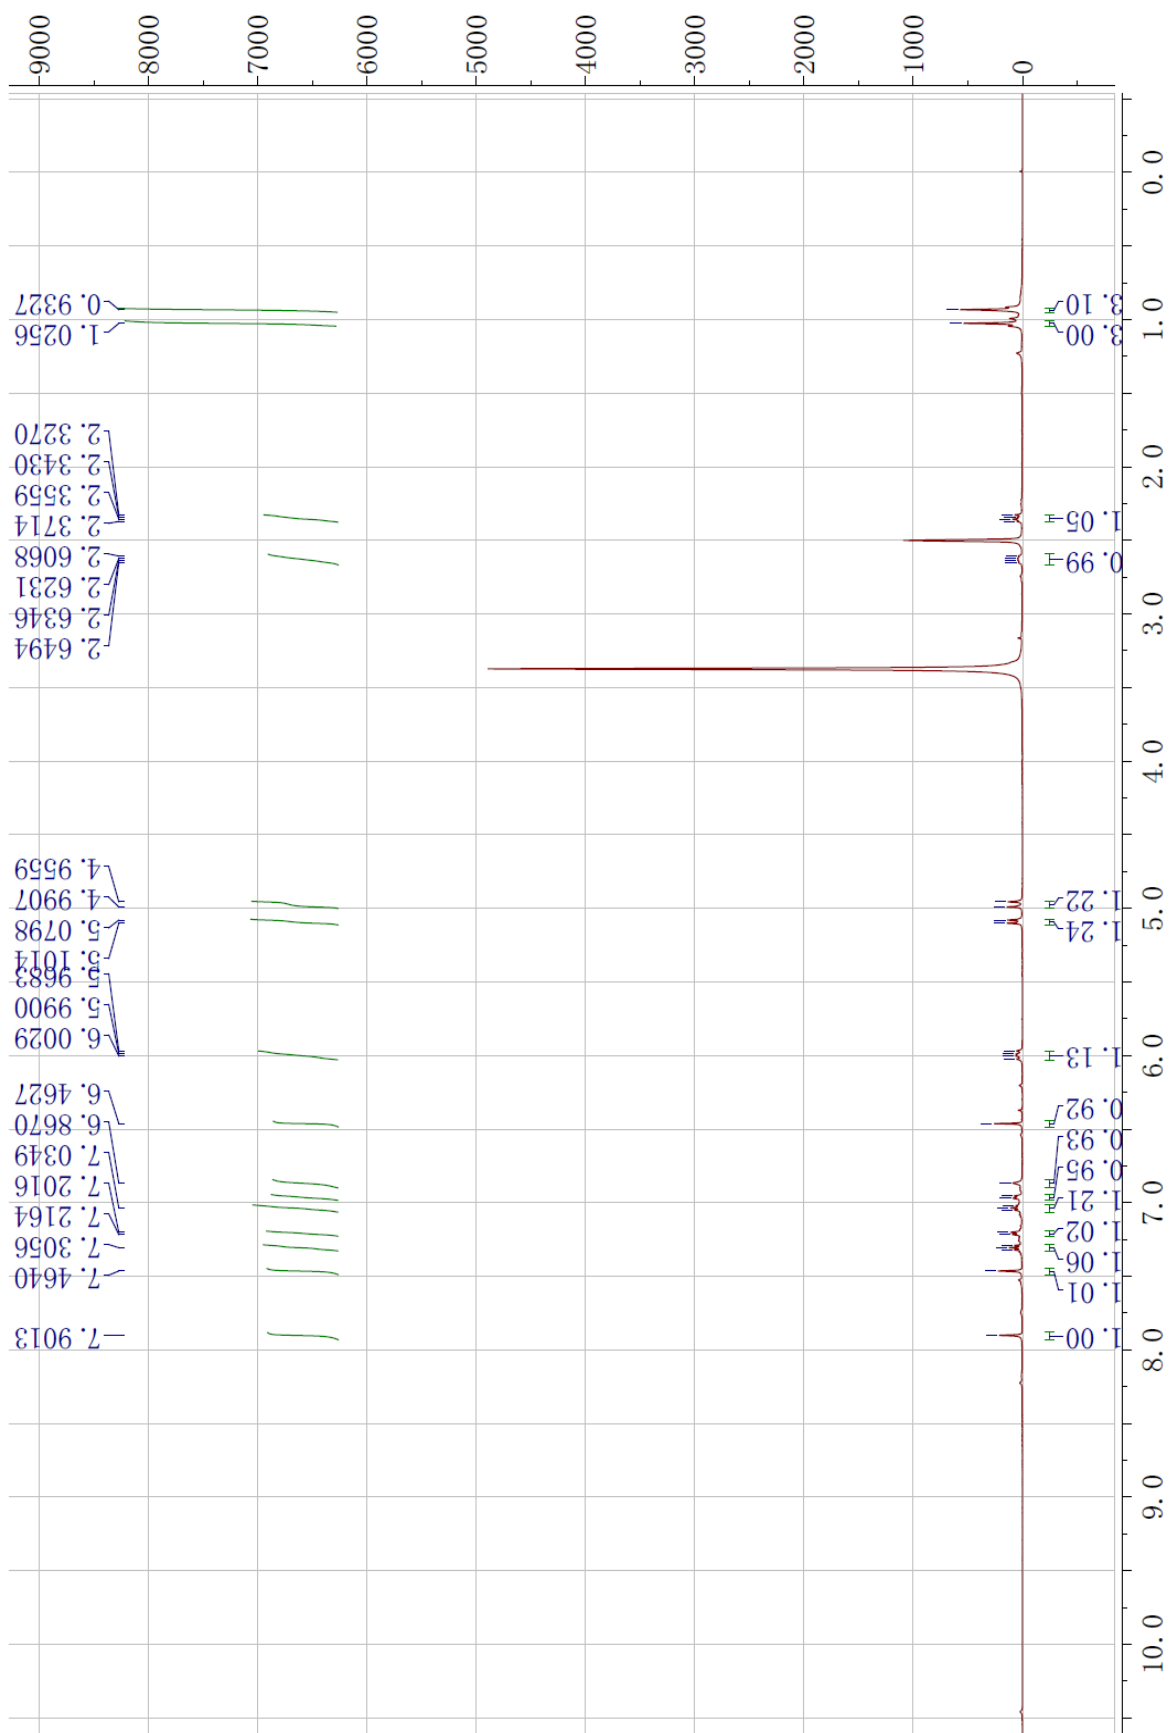

**Figure S17.** The  $^{13}\text{C}$  NMR spectrum of isopenilline A (2) in  $\text{DMSO-}d_6$

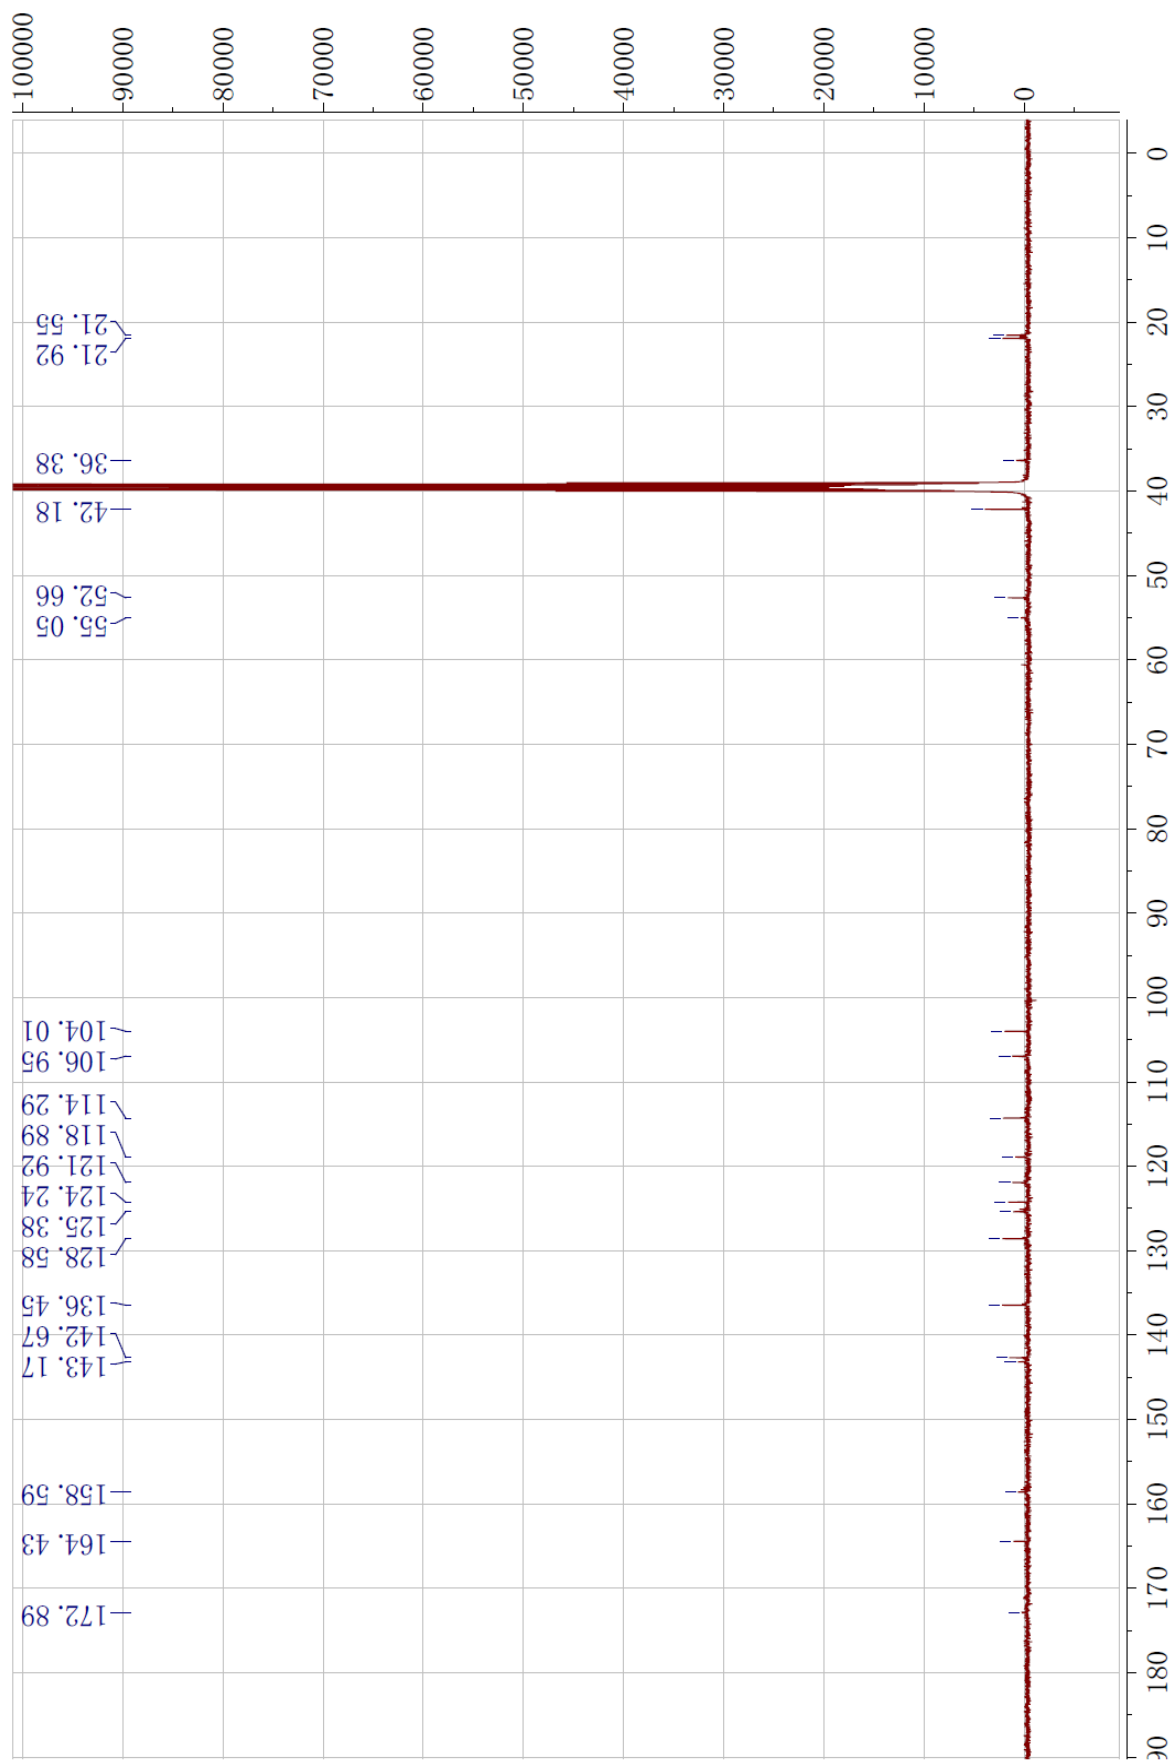

**Figure S18.** The HMQC spectrum of isopenilline A (**2**) in DMSO-*d*<sub>6</sub>

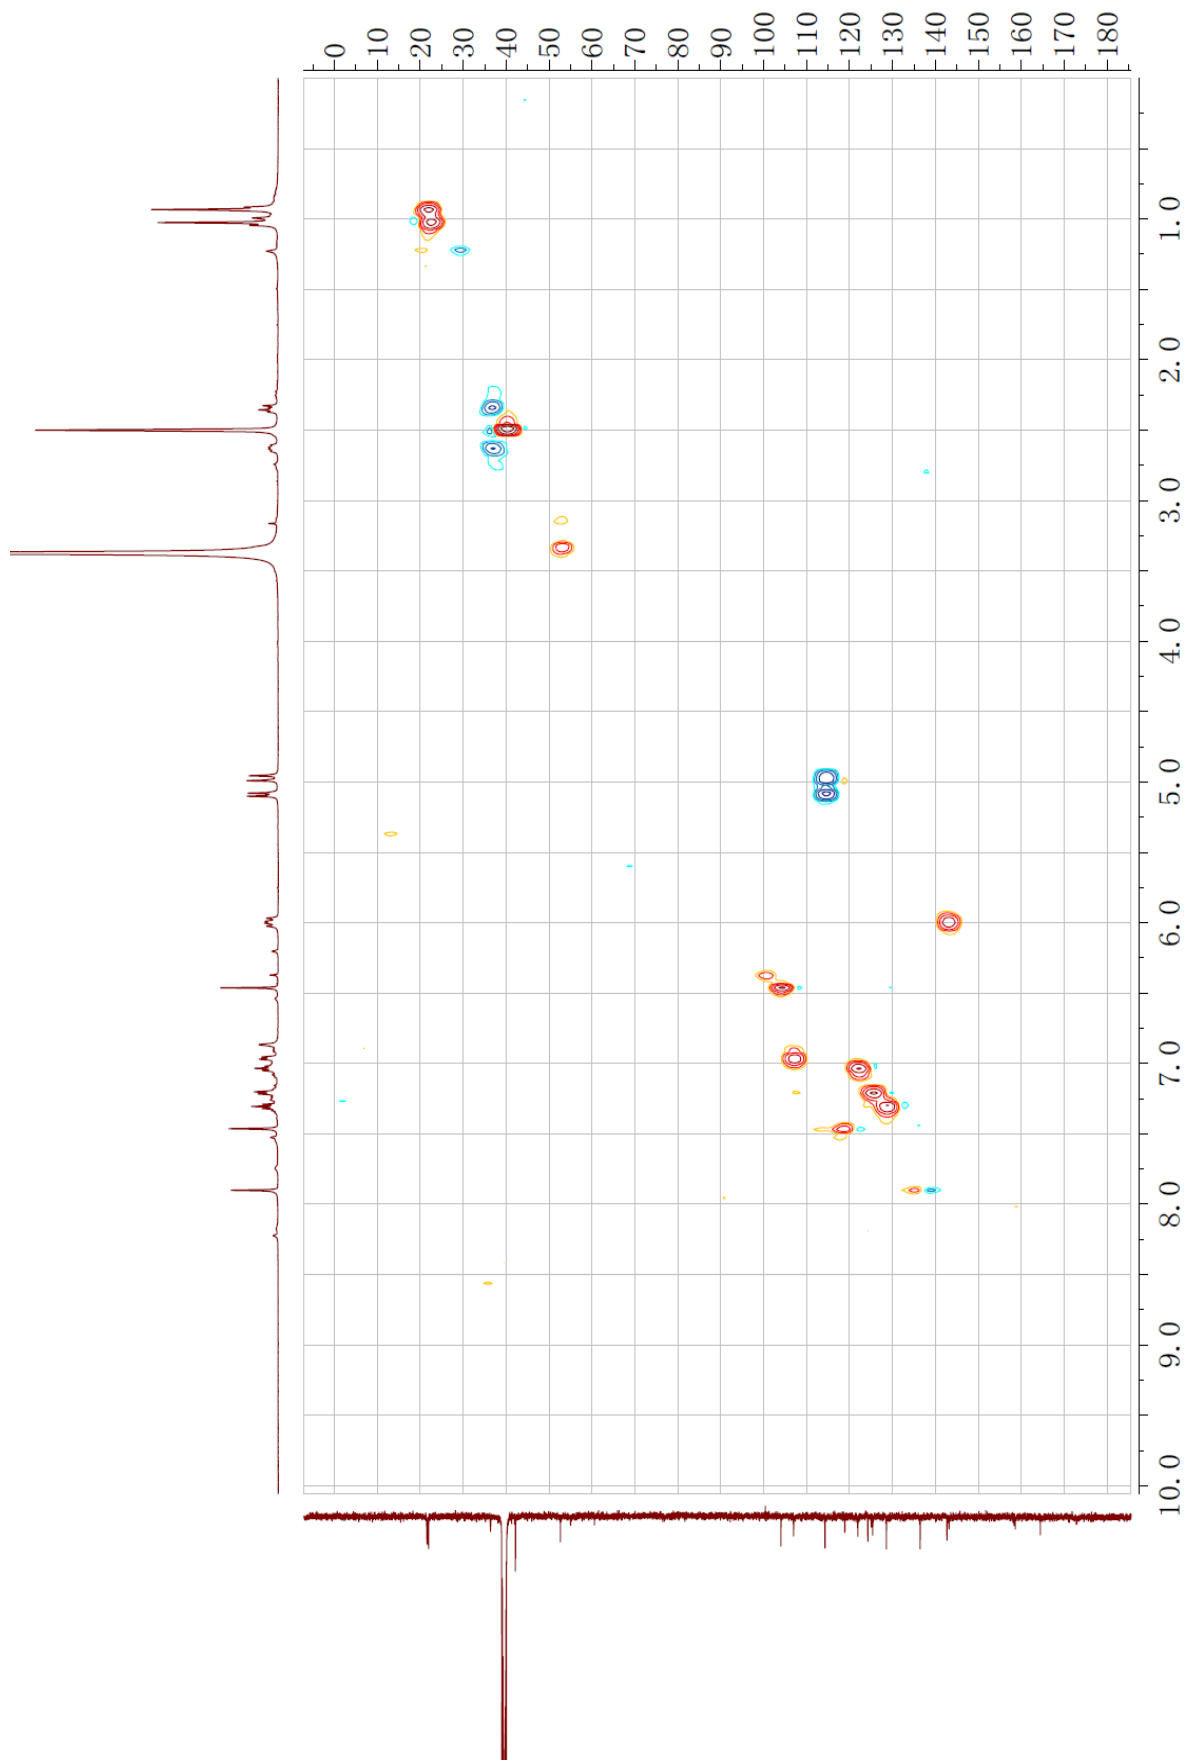

**Figure S19.** The  $^1\text{H}$ - $^1\text{H}$  COSY spectrum of isopenilline A (2) in  $\text{DMSO}-d_6$

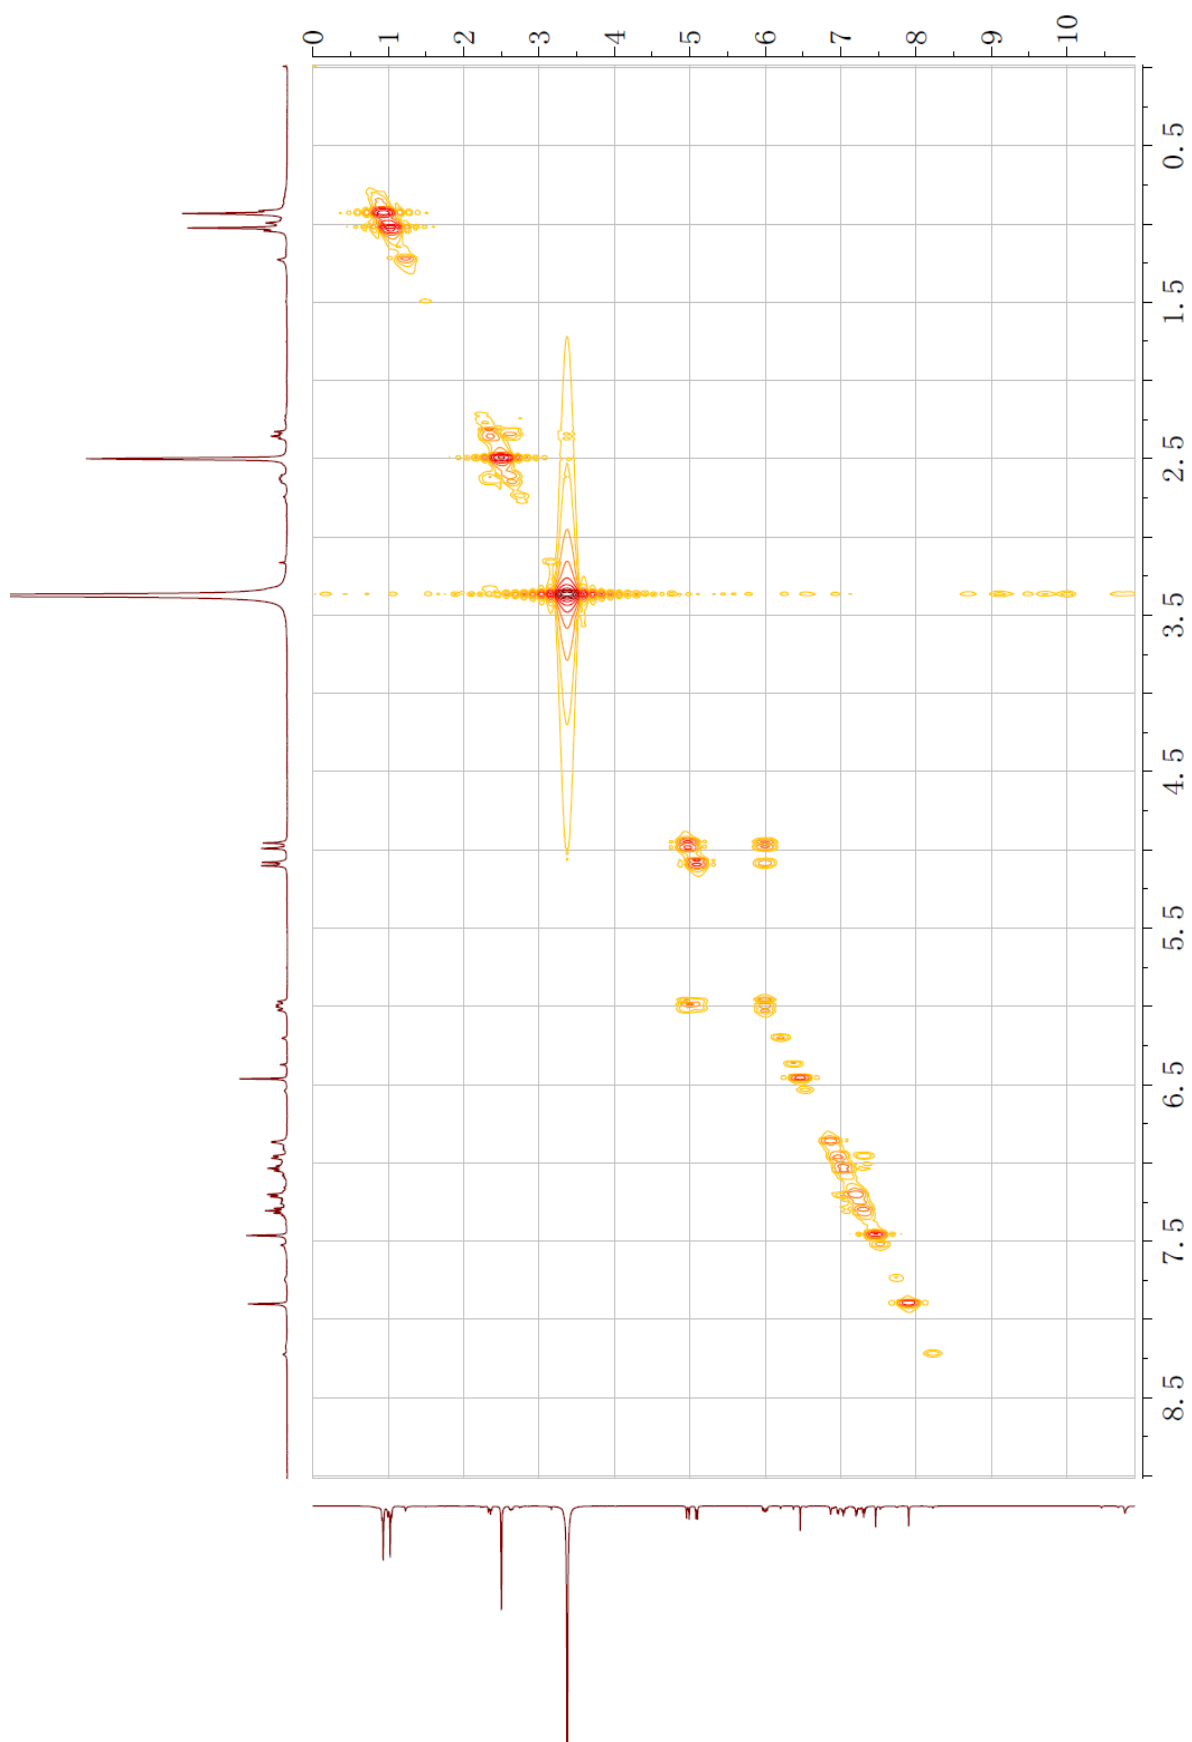

**Figure S20.** The HMBC spectrum of isopenilline A (2) in DMSO- $d_6$

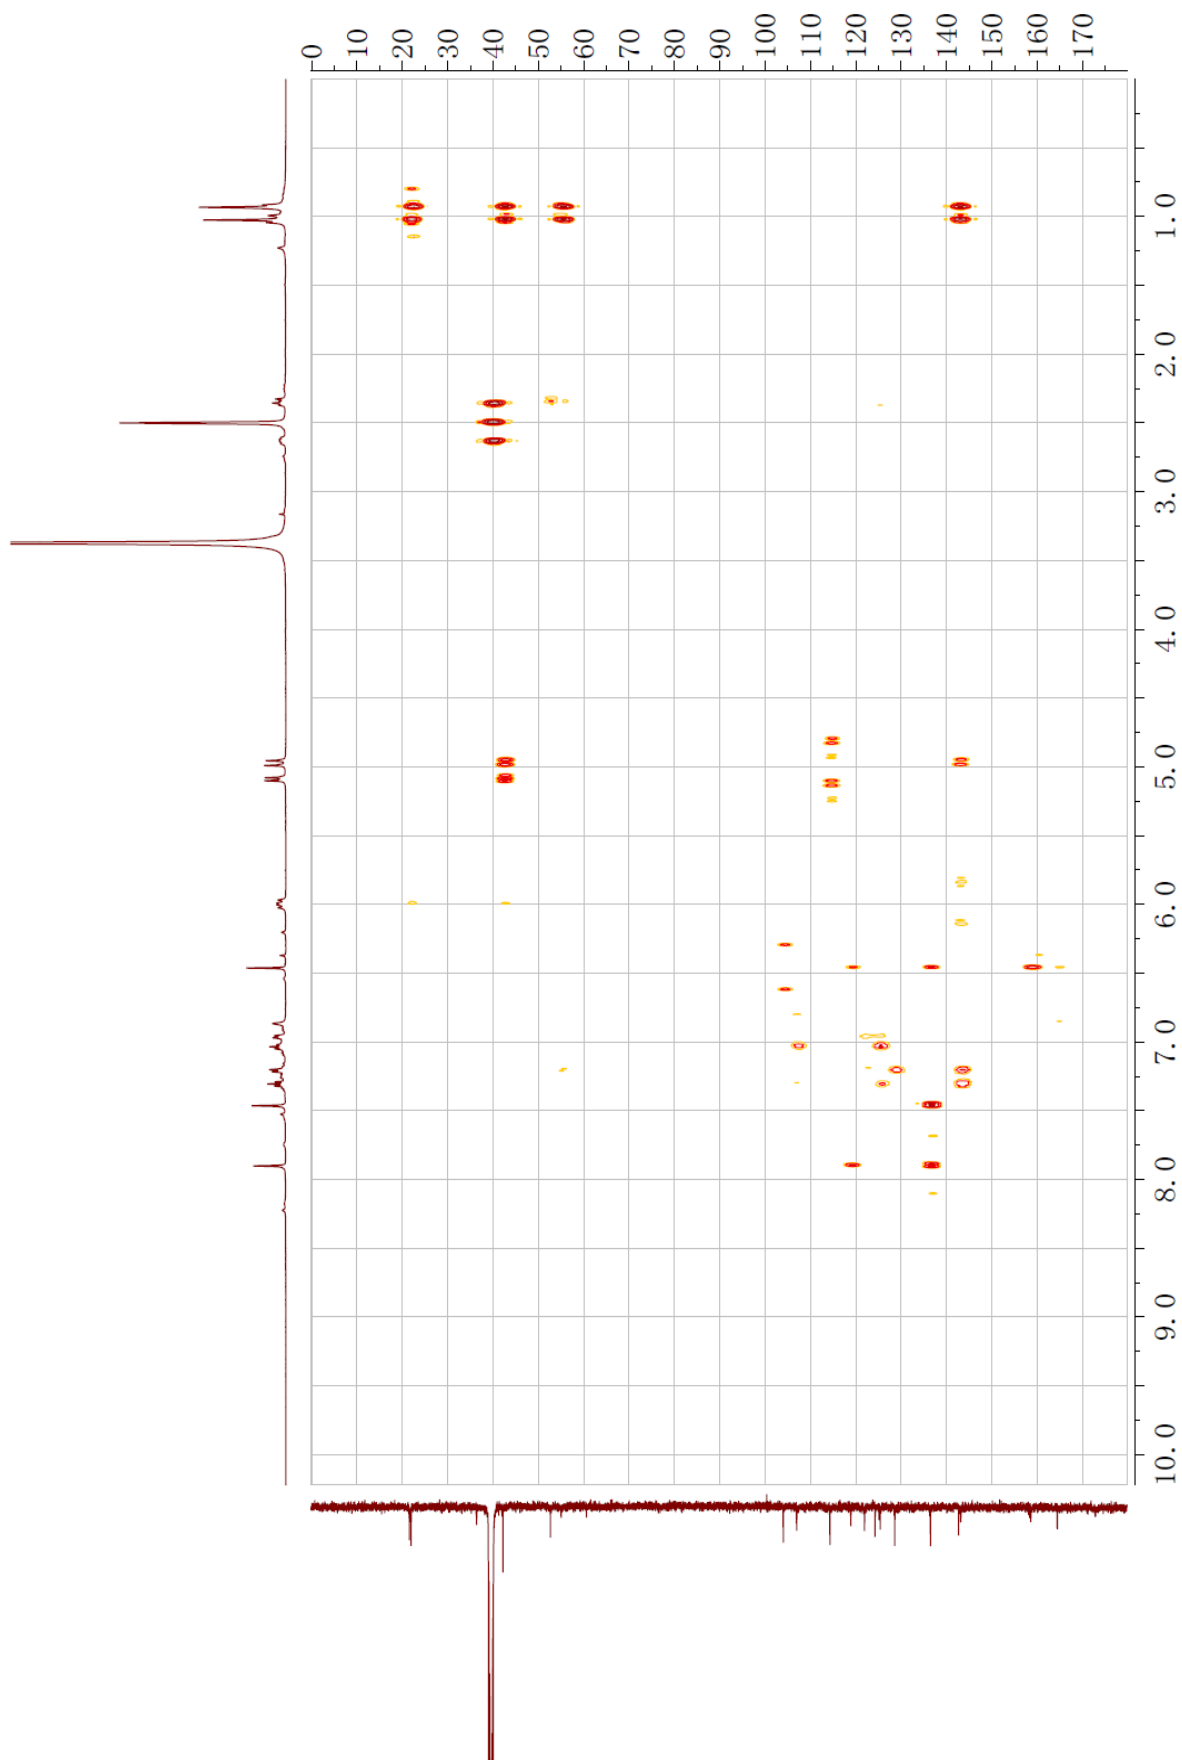

**Figure S21.** The NOESY spectrum of isopenilline A (2) in DMSO-*d*<sub>6</sub>



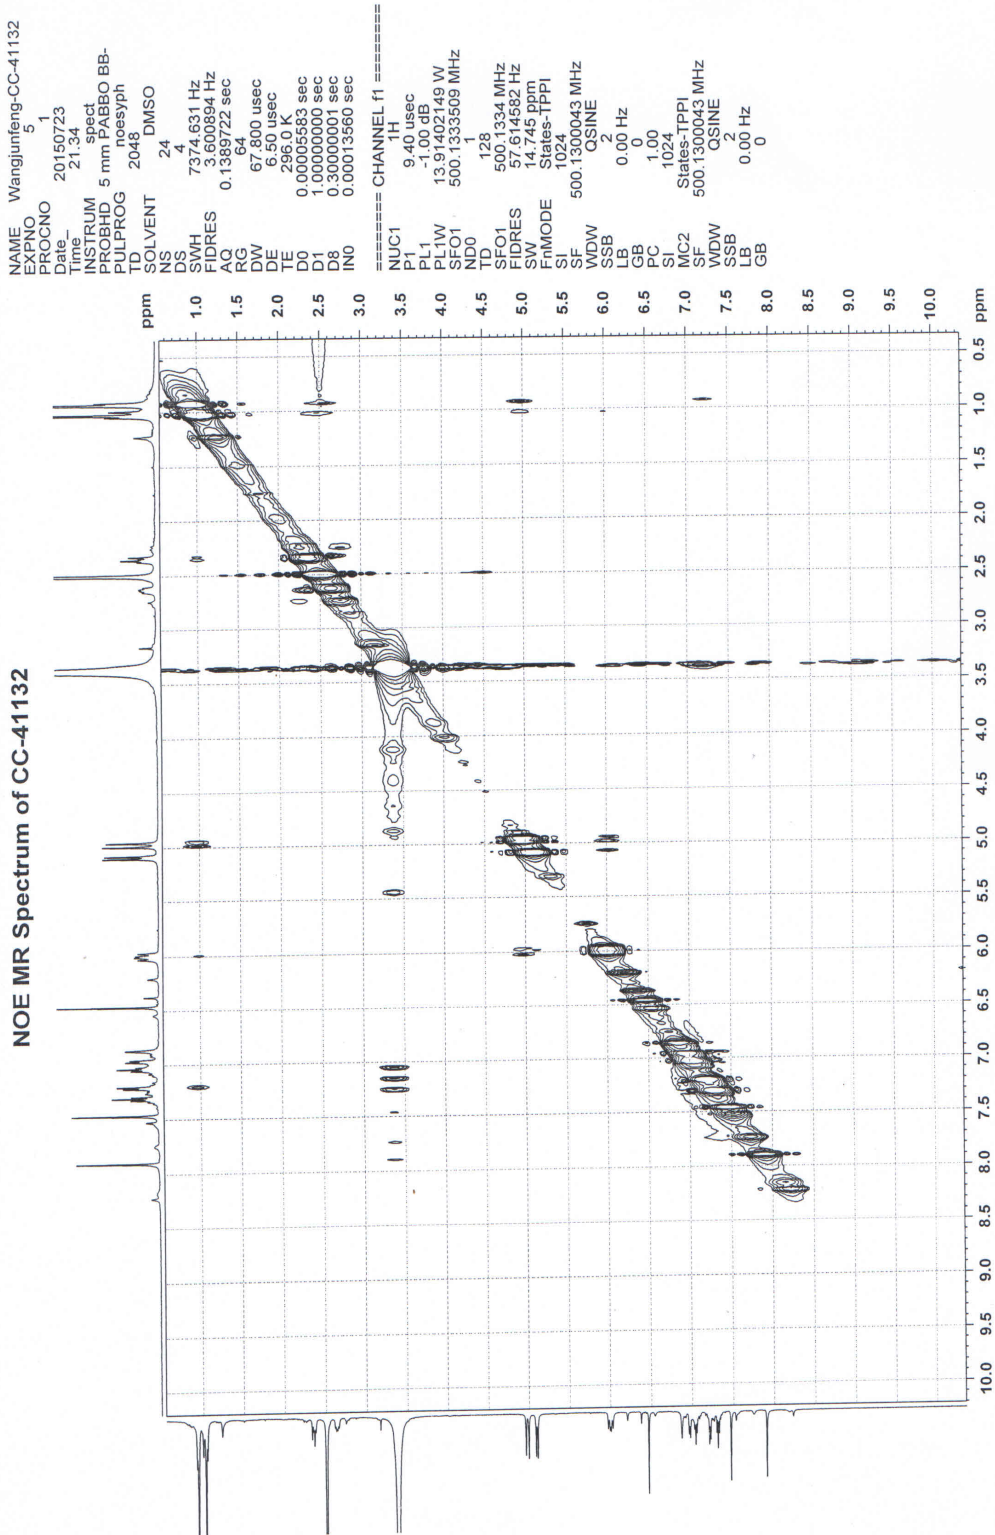

**Figure S22.** The HRESIMS spectrum of isopenilline A (2)

## Mass Spectrum SmartFormula Report

**Analysis Info**  
 Analysis Name: D:\Data\MS\data\201503\wangjunfeng\_cc-4113\_pos.d  
 Method: POS\_100-2000\_Direct Infusion.m  
 Sample Name: SCSIO  
 Comment:  
 Acquisition Date: 3/23/2015 9:16:46 AM  
 Operator: SCSIO  
 Instrument / Ser#: maXis 29

**Acquisition Parameter**  
 Source Type: ESI  
 Focus: Not active  
 Scan Begin: 100 m/z  
 Scan End: 2500 m/z  
 Ion Polarity: Positive  
 Set Capillary: 4500 V  
 Set End Plate Offset: -500 V  
 Set Collision Cell RF: 2000.0 Vpp  
 Set Nebulizer: 0.3 Bar  
 Set Dry Heater: 180 °C  
 Set Dry Gas: 4.0 l/min  
 Set Divert Valve: Waste

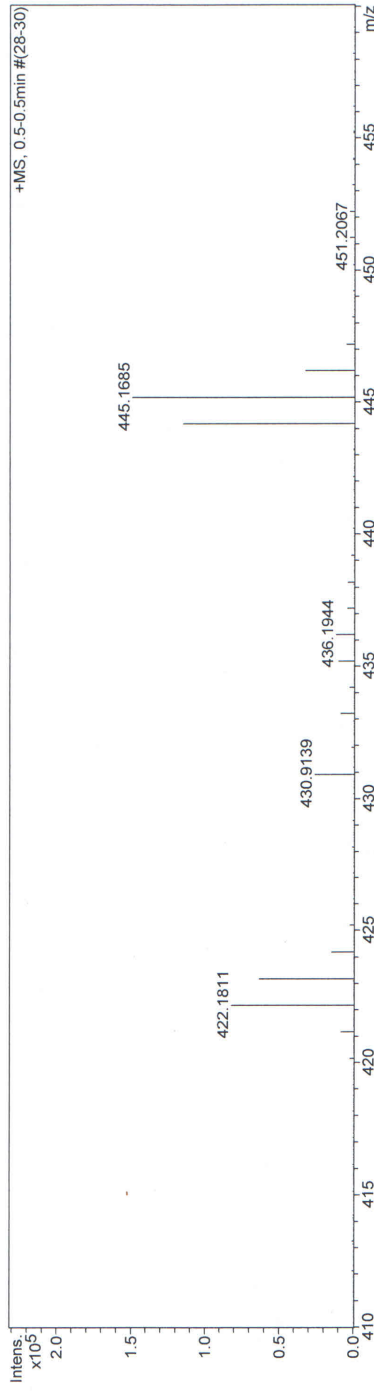

| Meas. m/z | # | Formula                                                         | Score  | m/z      | err [mDa] | err [ppm] | mSigma | rdB  | e <sup>-</sup> Conf | N-Rule |
|-----------|---|-----------------------------------------------------------------|--------|----------|-----------|-----------|--------|------|---------------------|--------|
| 422.1811  | 1 | C <sub>22</sub> H <sub>24</sub> N <sub>5</sub> O <sub>4</sub>   | 100.00 | 422.1823 | 1.2       | 2.8       | 307.8  | 13.5 | even                | ok     |
| 444.1629  | 1 | C <sub>22</sub> H <sub>23</sub> N <sub>5</sub> NaO <sub>4</sub> | 100.00 | 444.1642 | 1.3       | 2.9       | 461.2  | 13.5 | even                | ok     |

**Figure S23.** The UV spectrum of isopenilline A (2)

# 光谱峰值检测报告

2015-04-30 15:15:04

数据集: **GC4113** - RawData

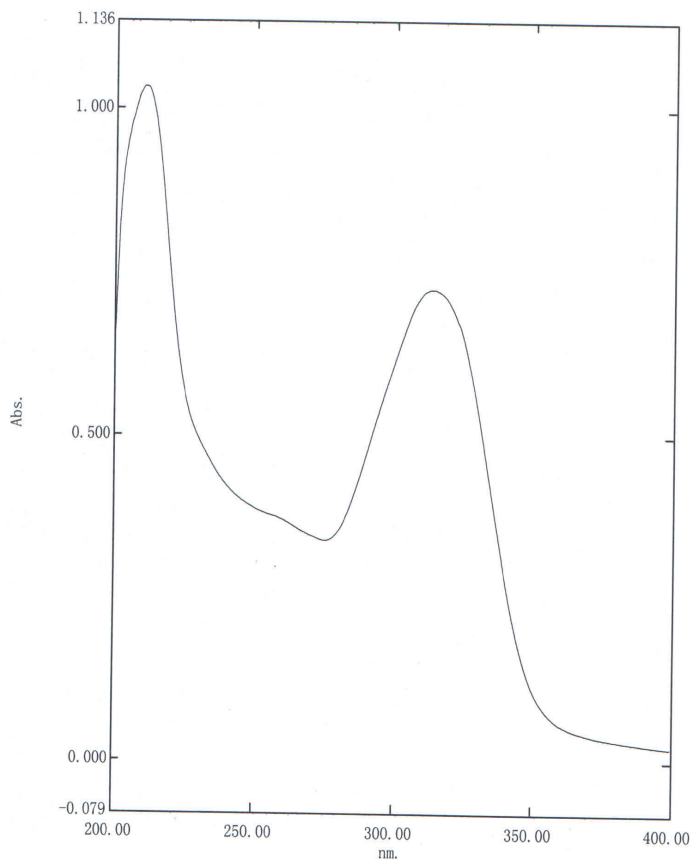

[测定属性]  
 波长范围 (nm.): 200.00 到 400.00  
 扫描速度: 中速  
 采样间隔: 0.2  
 自动采样间隔: 启用  
 扫描模式: 单个

[仪器属性]  
 仪器类型: UV-2600 系列  
 测定方式: 吸收值  
 狭缝宽: 2.0  
 积分时间: 0.1 秒  
 光源转换波长: 323.0 nm  
 检测器单元: 直接  
 S/R 转换: 标准  
 阶梯校正: OFF

[附件属性]  
 附件: 无

[数据处理参数]  
 阈值: 0.010000  
 点: 4  
 内插: 停用  
 平均: 停用

[样品准备属性]  
 重量:  
 体积:  
 稀释:  
 光程长:  
 附加信息:

| No. | P/V | 波长 (nm) | 吸收值   | 描述 |
|-----|-----|---------|-------|----|
| 1   | ⬆   | 313.40  | 0.725 |    |
| 2   | ⬆   | 210.40  | 1.034 |    |
| 3   | ⬇   | 275.20  | 0.339 |    |

Figure S24. The <sup>1</sup>H NMR spectrum of penilline B (3) in CD<sub>3</sub>OD

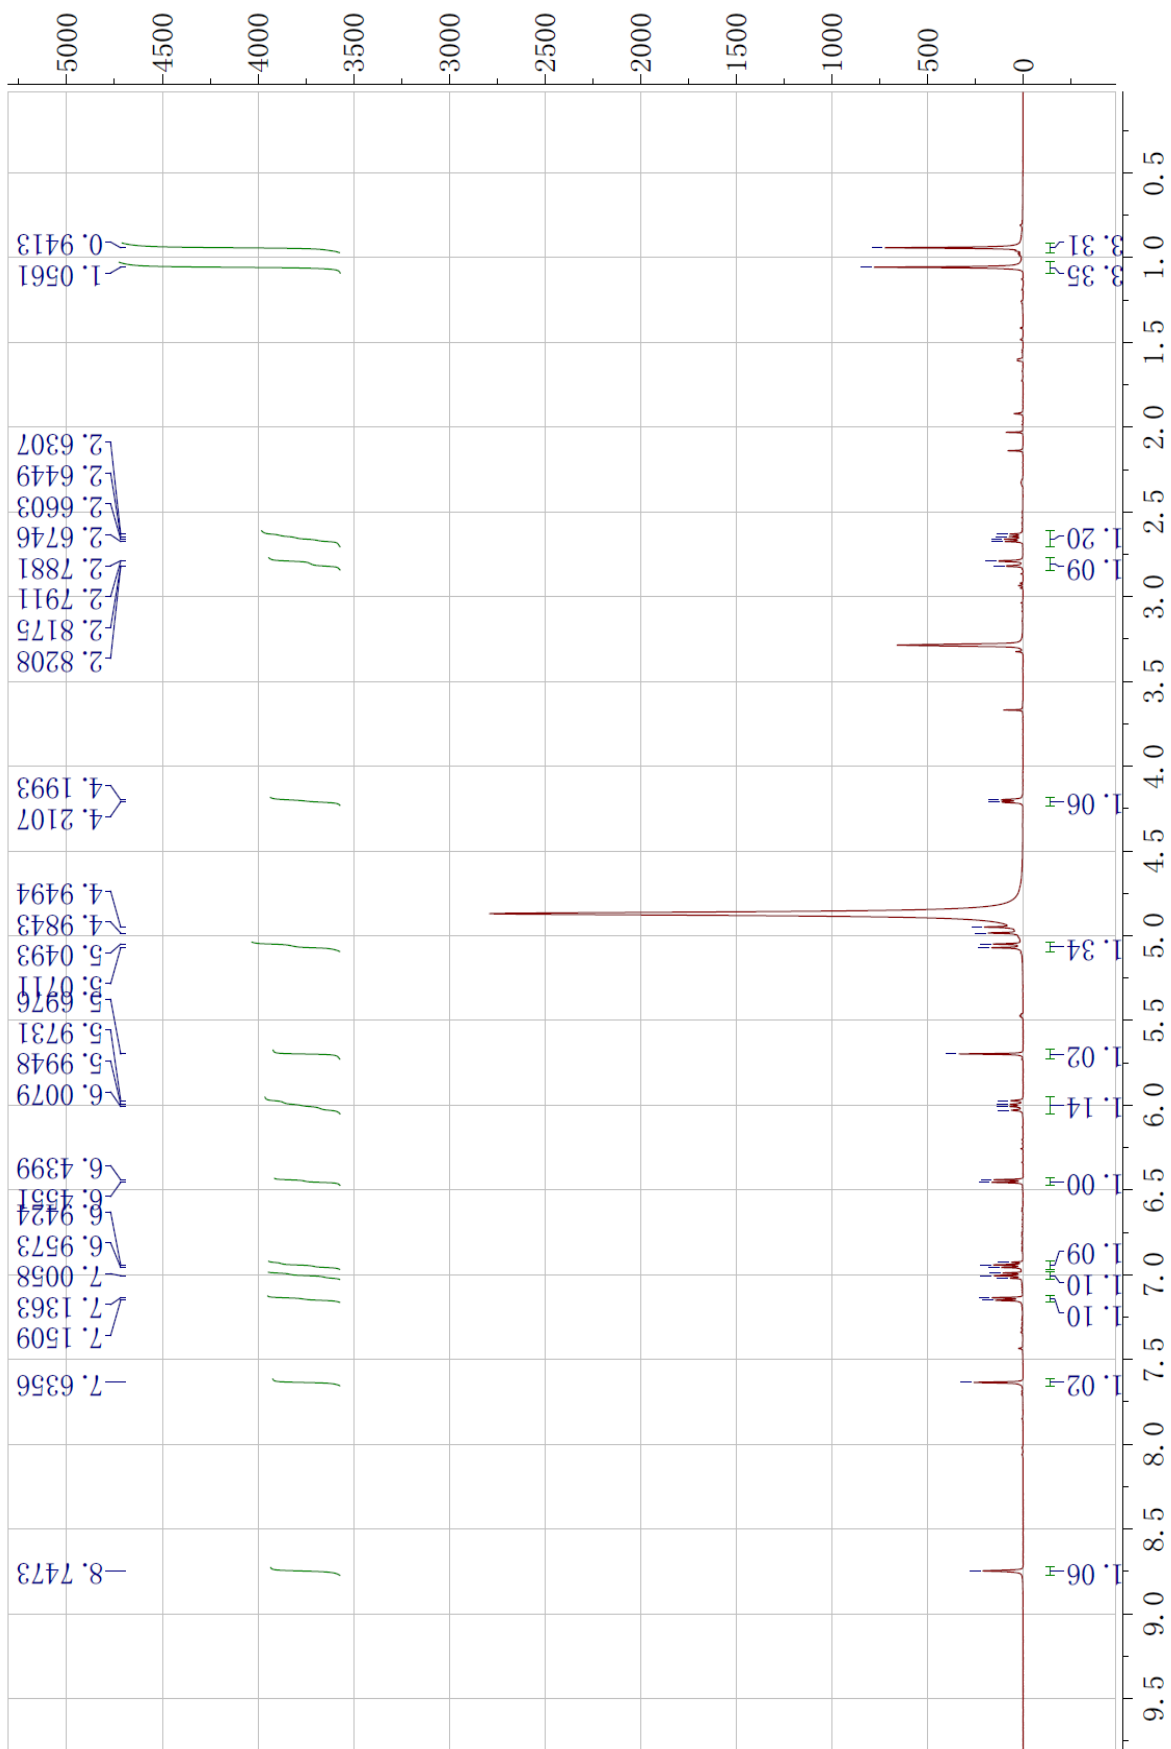

**Figure S25.** The  $^{13}\text{C}$  NMR spectrum of penilline B (3) in  $\text{CD}_3\text{OD}$

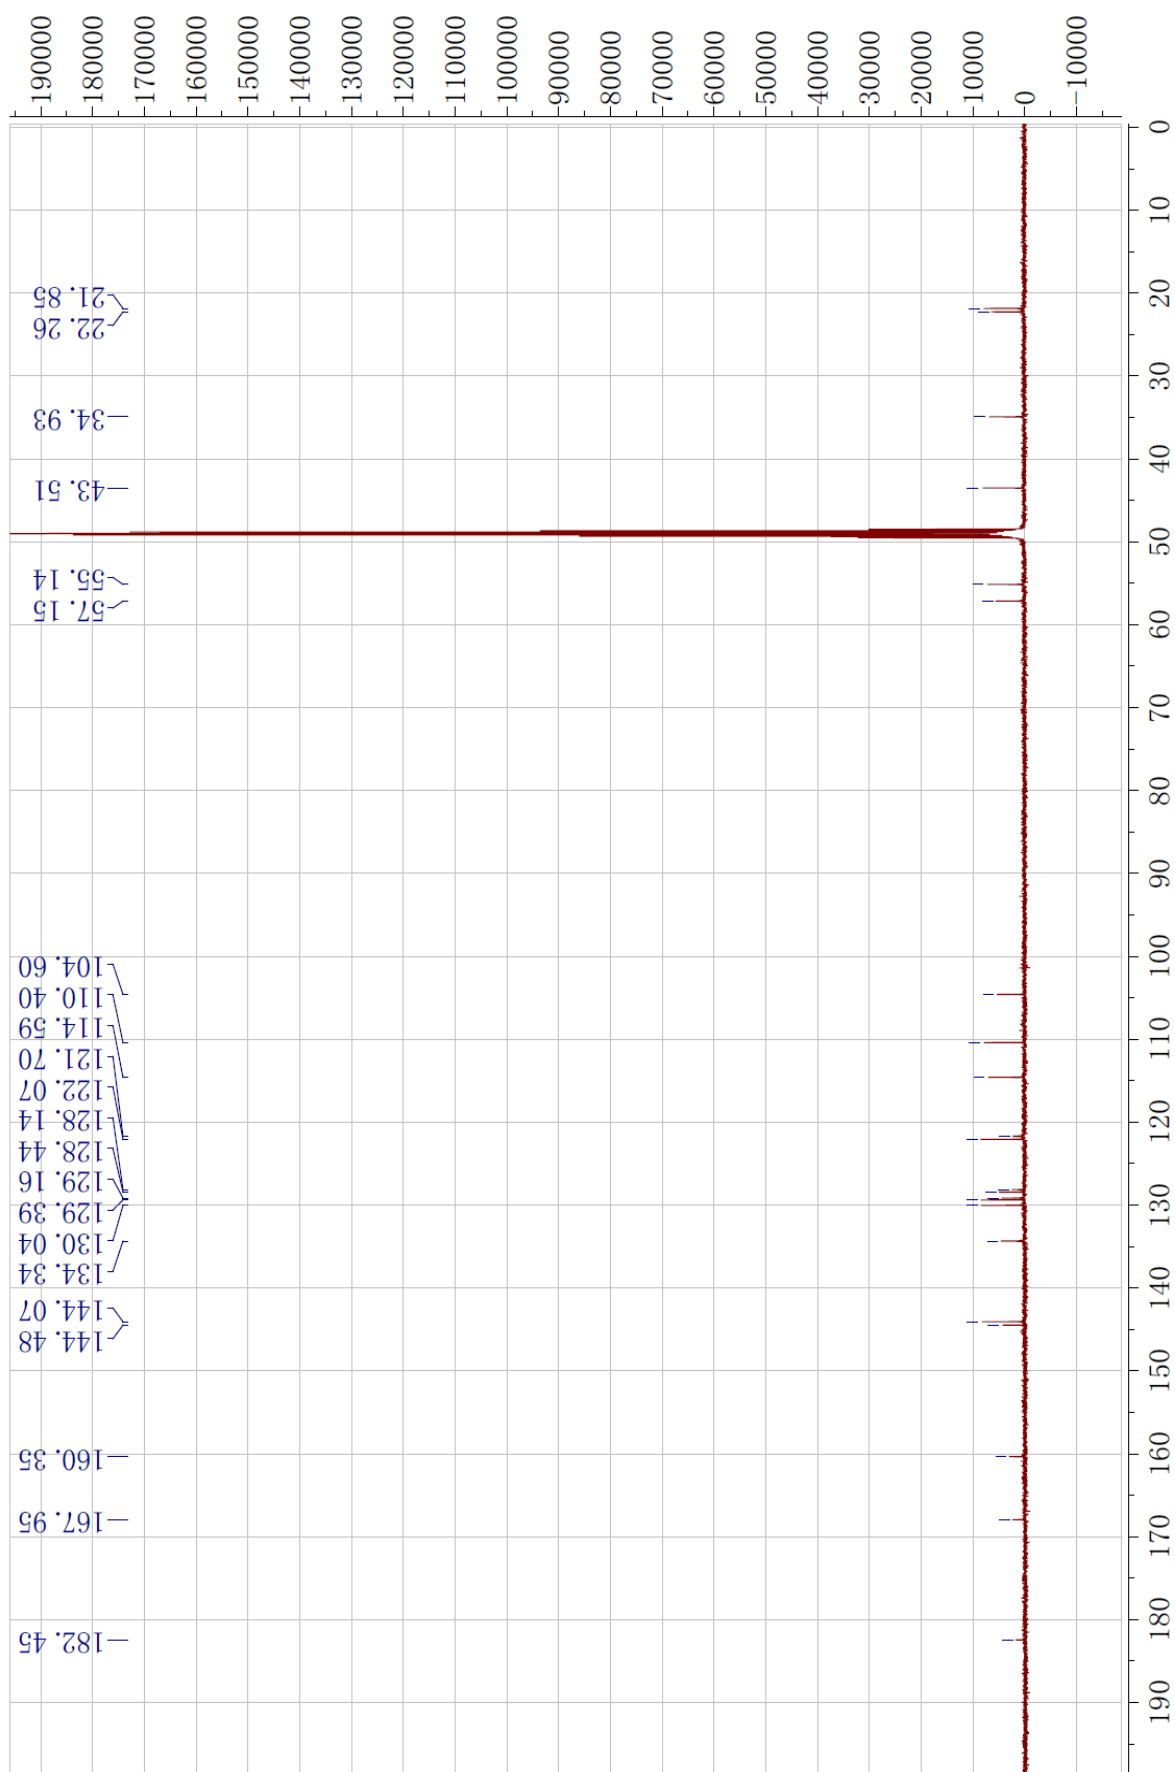

**Figure S26.** The HMQC spectrum of penilline B (**3**) in  $\text{CD}_3\text{OD}$

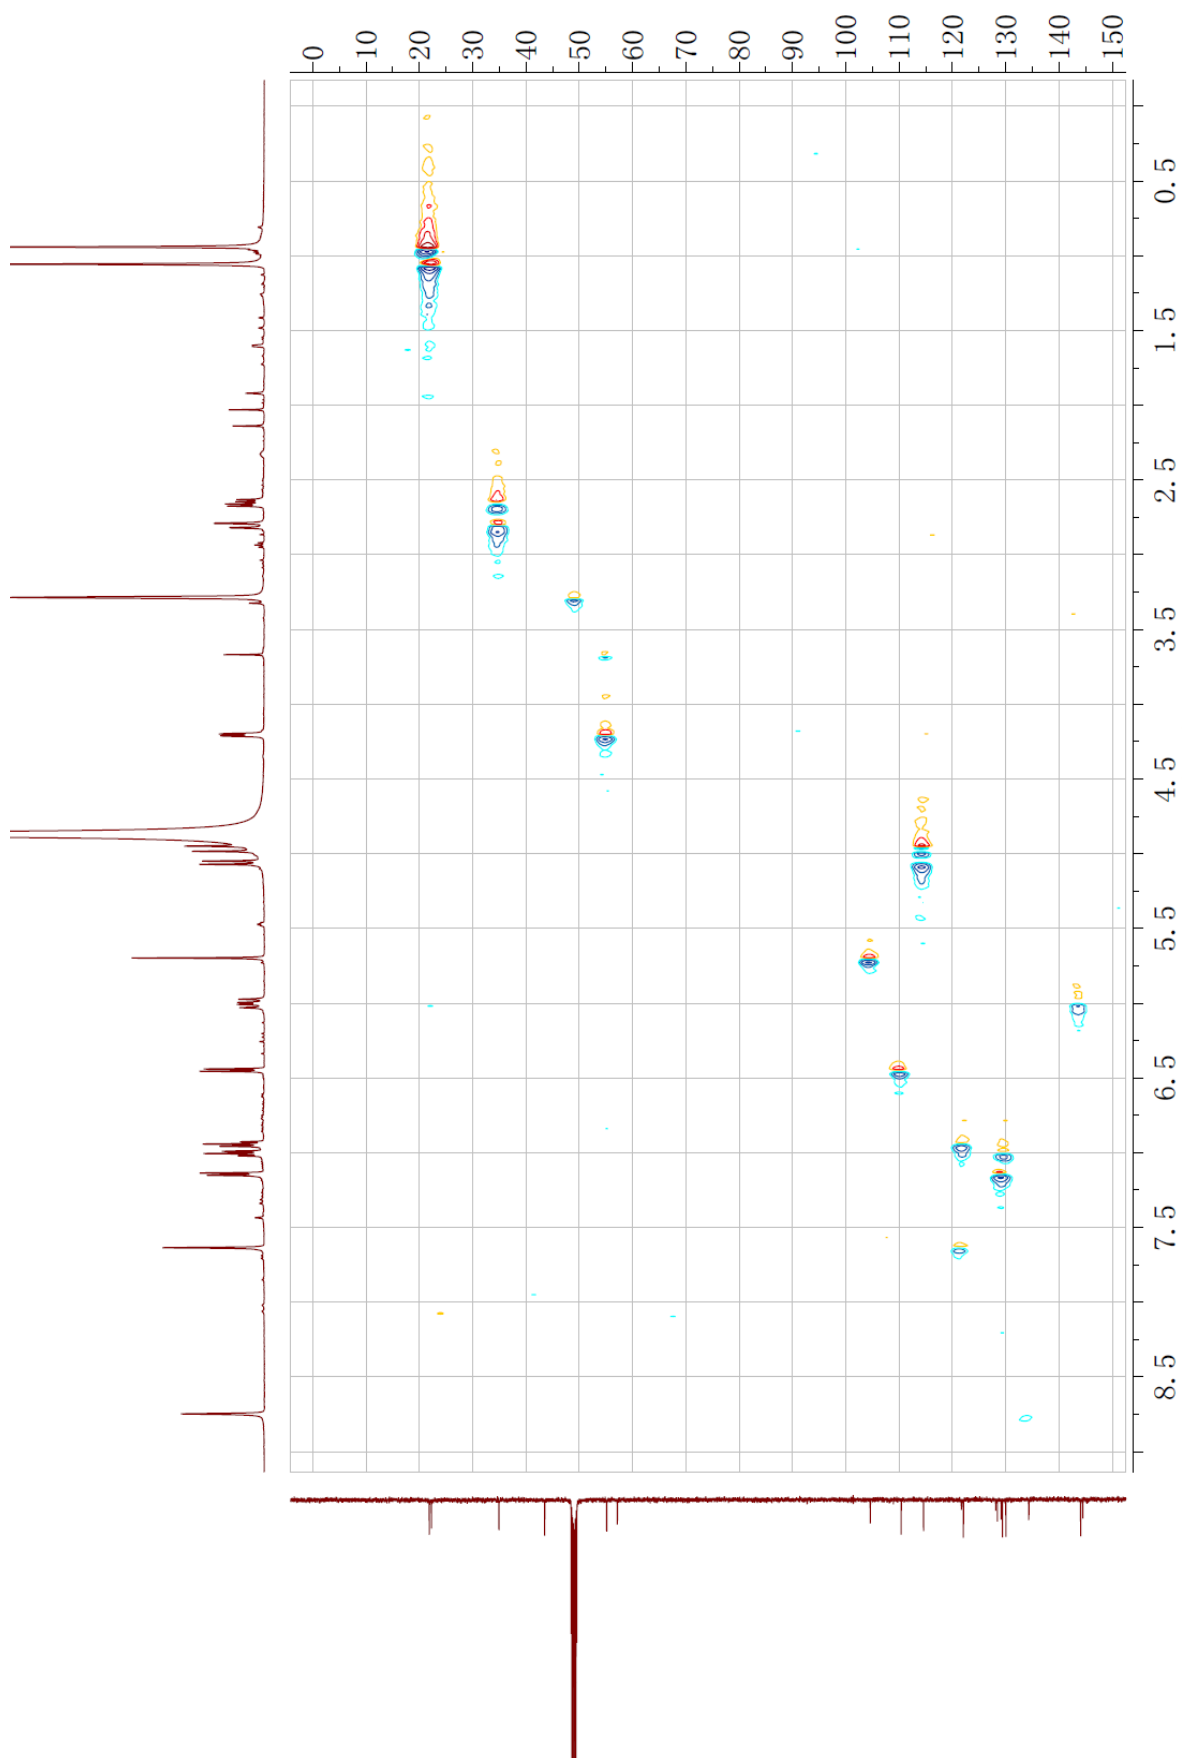

**Figure S27.** The  $^1\text{H}$ - $^1\text{H}$  COSY spectrum of penilline B (3) in  $\text{CD}_3\text{OD}$

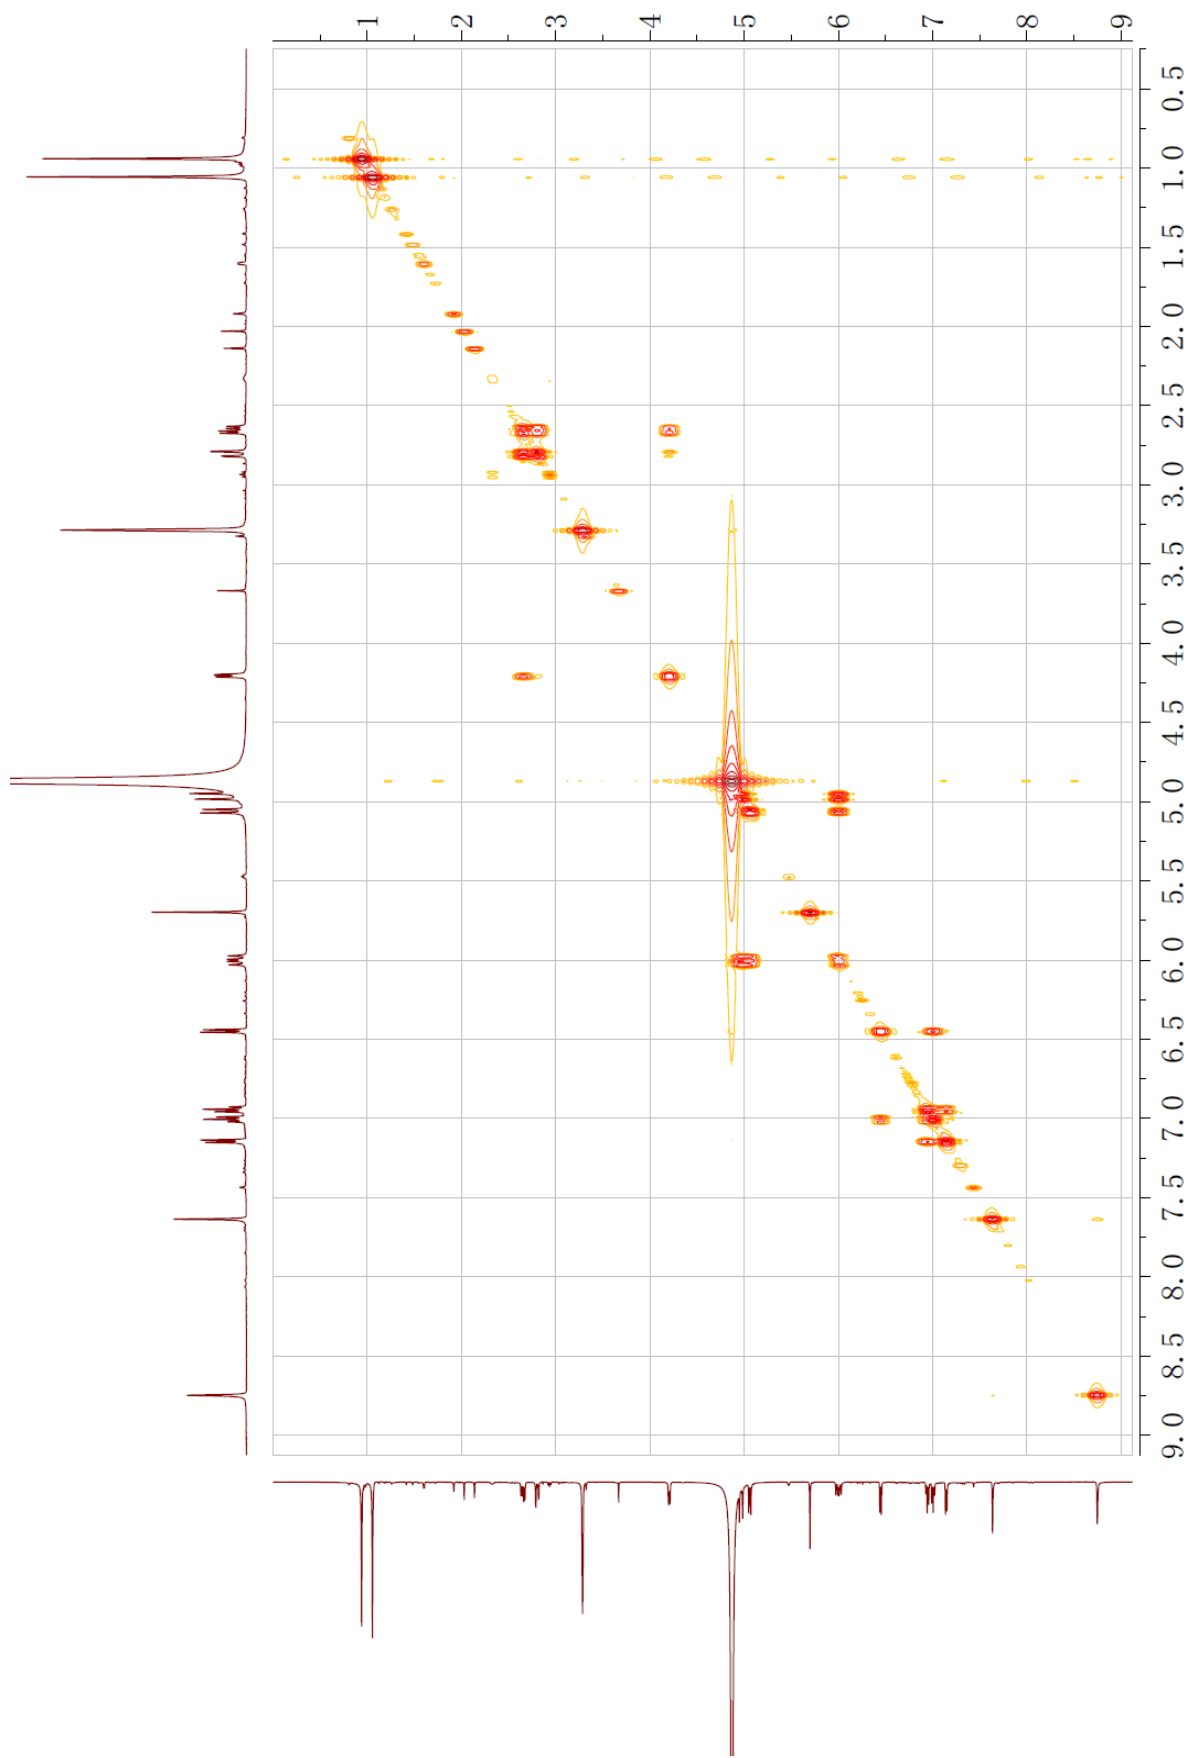

**Figure S28.** The HMBC spectrum of penilline B (3) in CD<sub>3</sub>OD

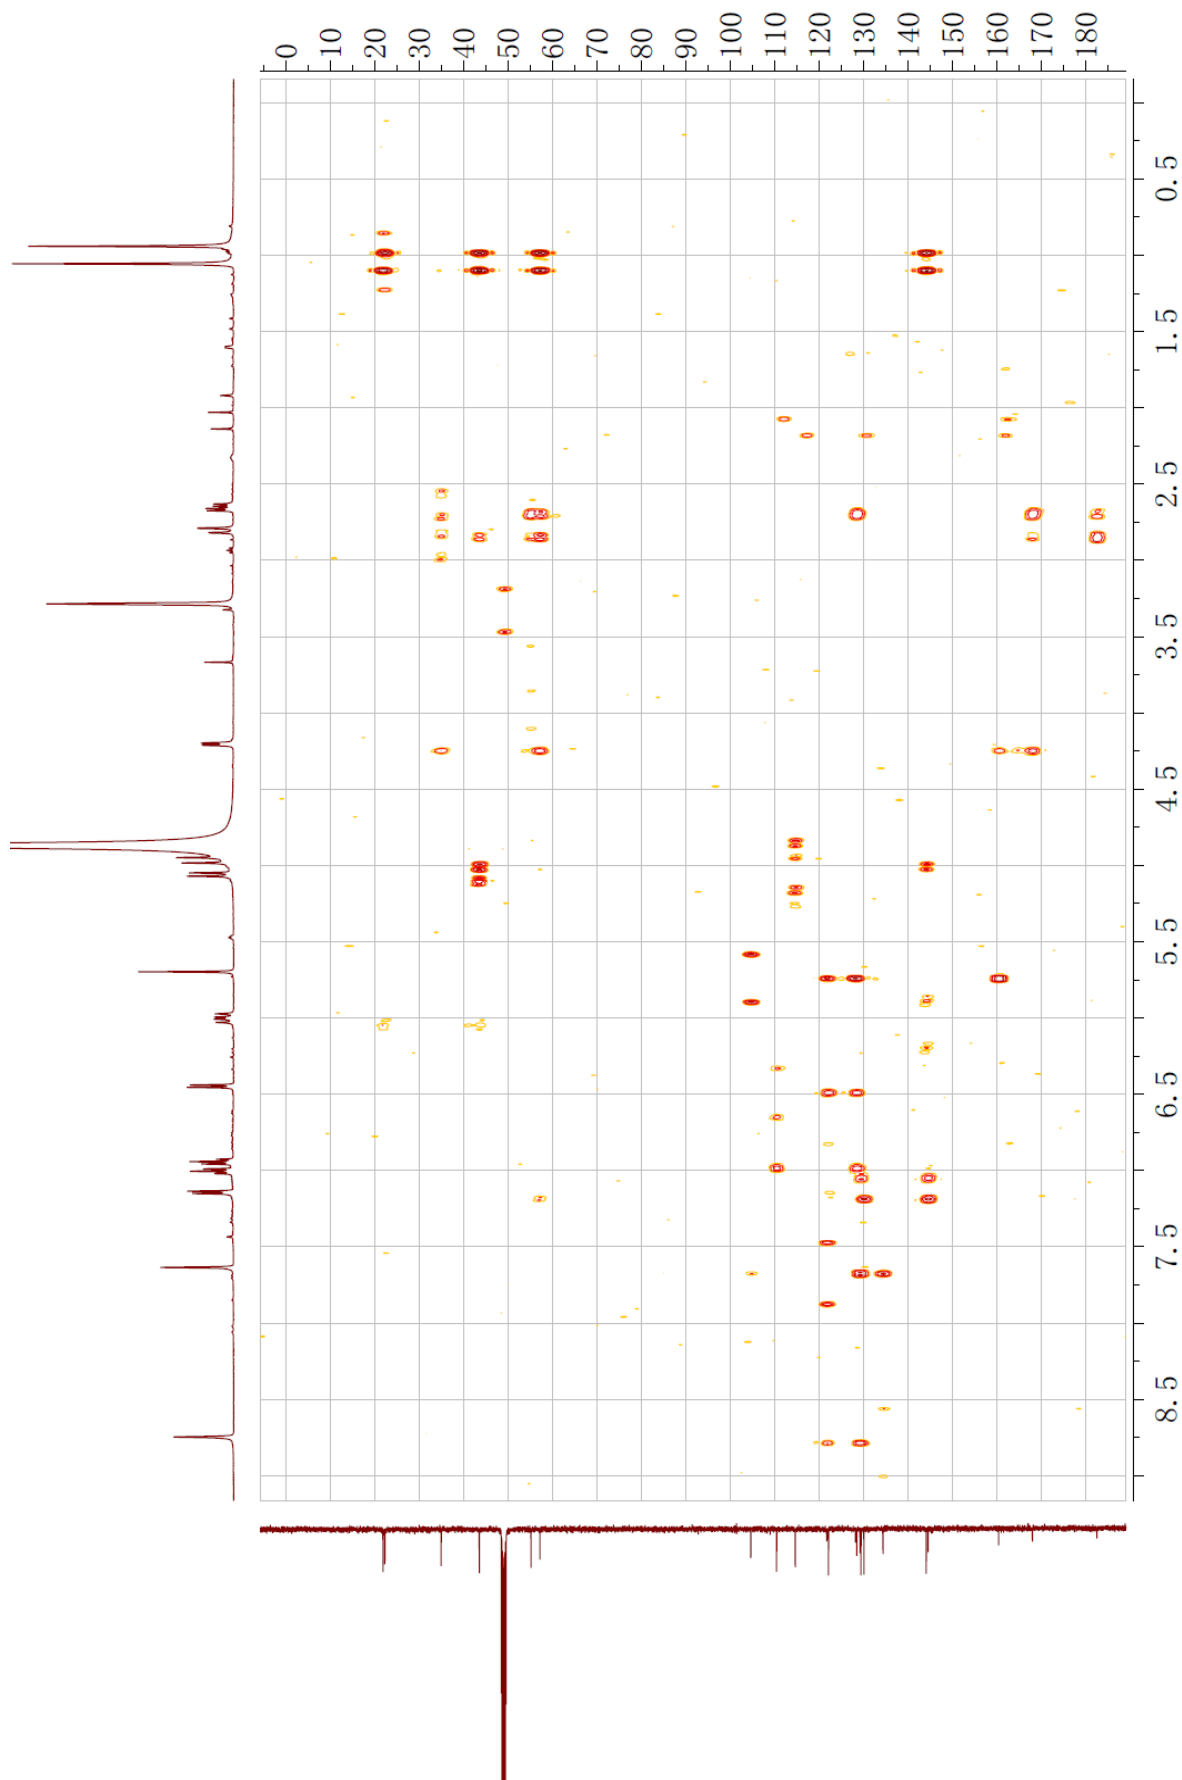

Figure S29. The  $^1\text{H}$  NMR spectrum of penilline B (3) in  $\text{DMSO-}d_6$



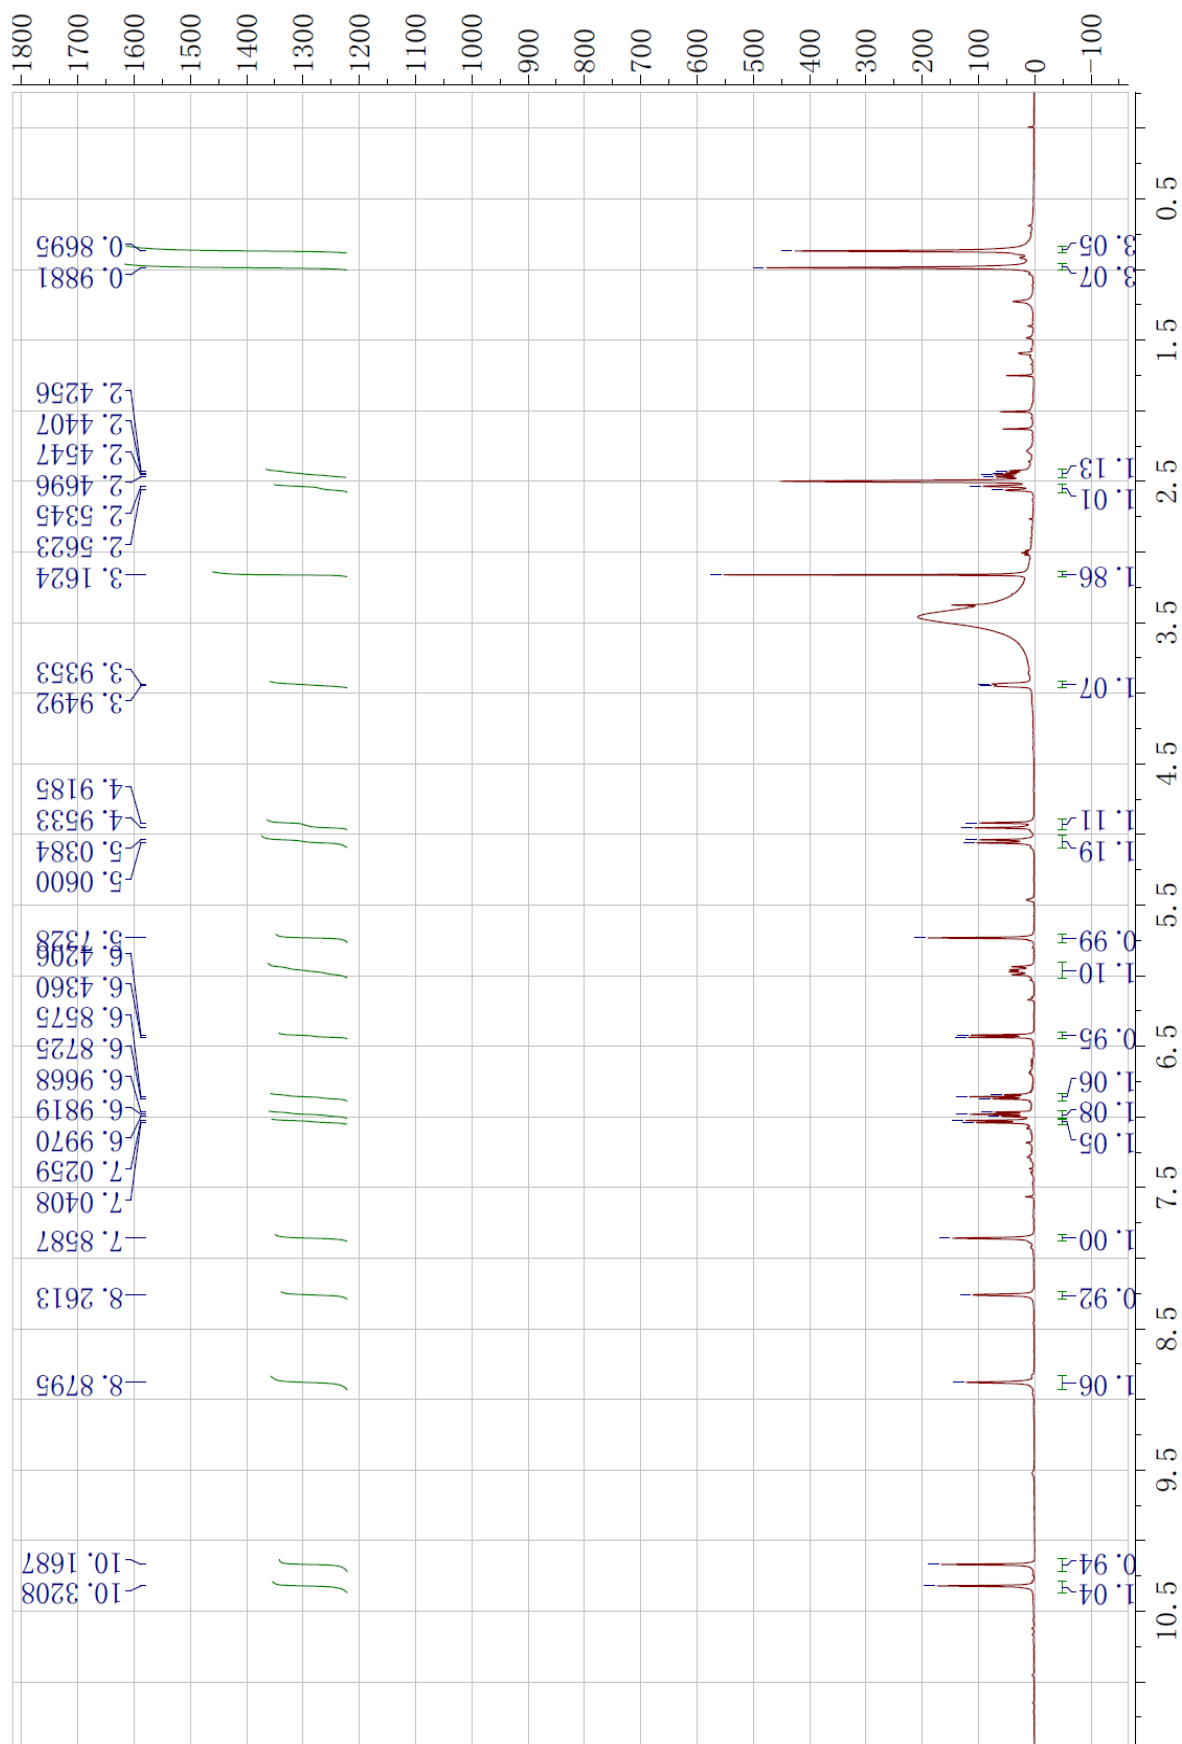

**Figure S30.** The  $^{13}\text{C}$  NMR spectrum of penilline B (3) in  $\text{DMSO-}d_6$

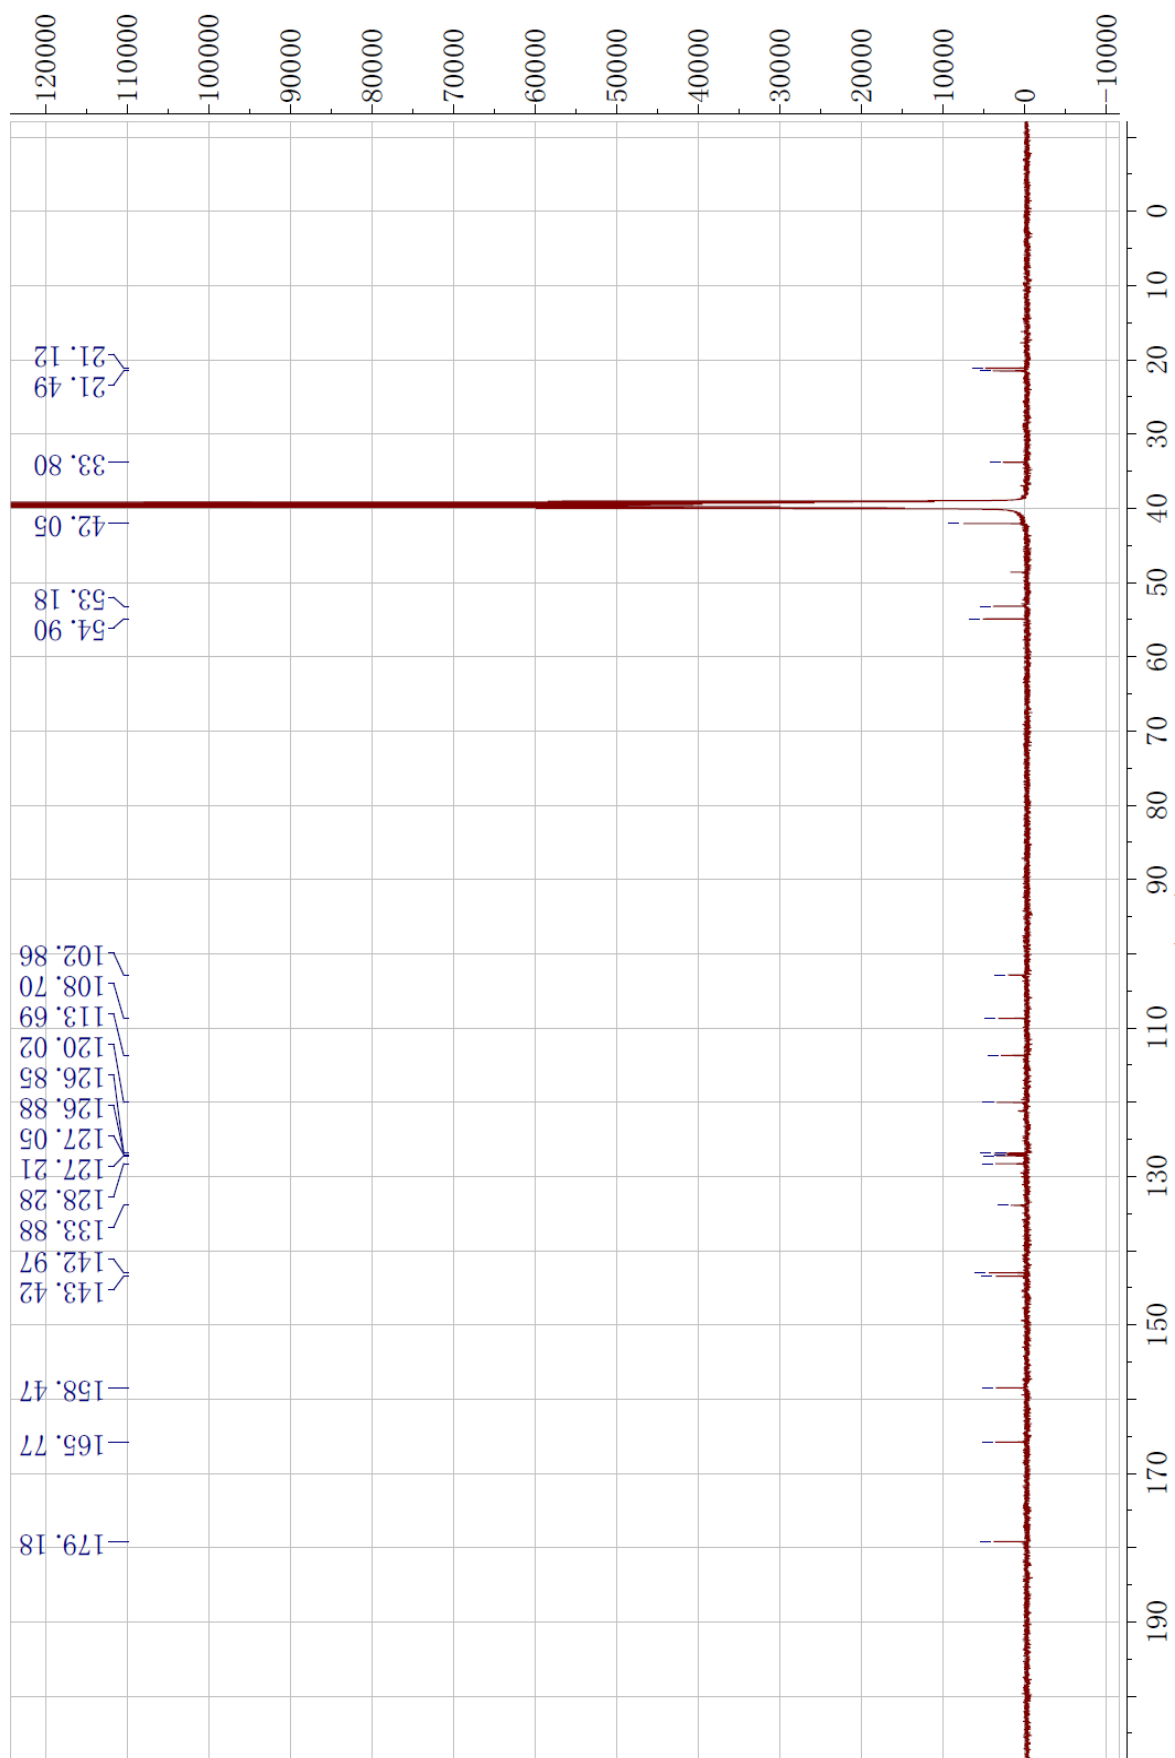

**Figure S31.** The HMQC spectrum of penilline B (3) in DMSO- $d_6$

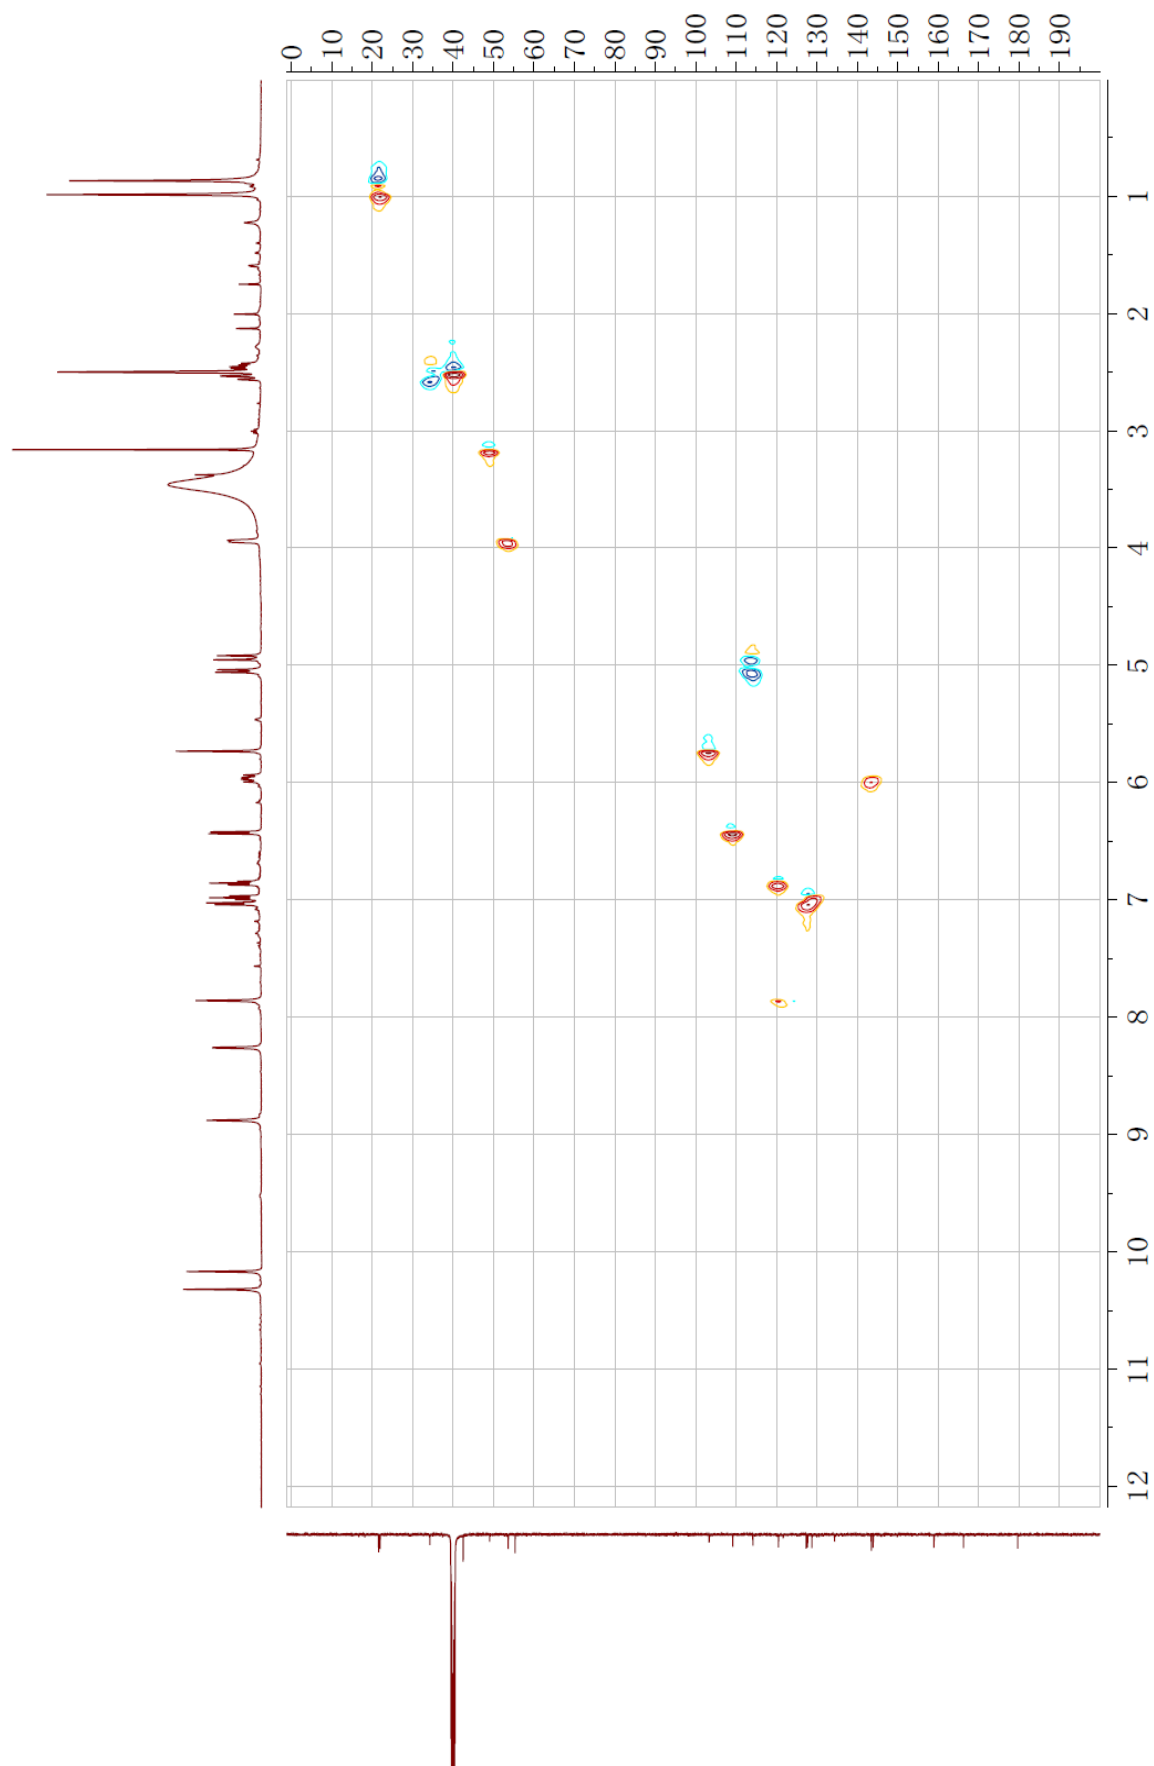

Figure S32. The  $^1\text{H}$ - $^1\text{H}$  COSY spectrum of penilline B (3) in  $\text{DMSO-}d_6$

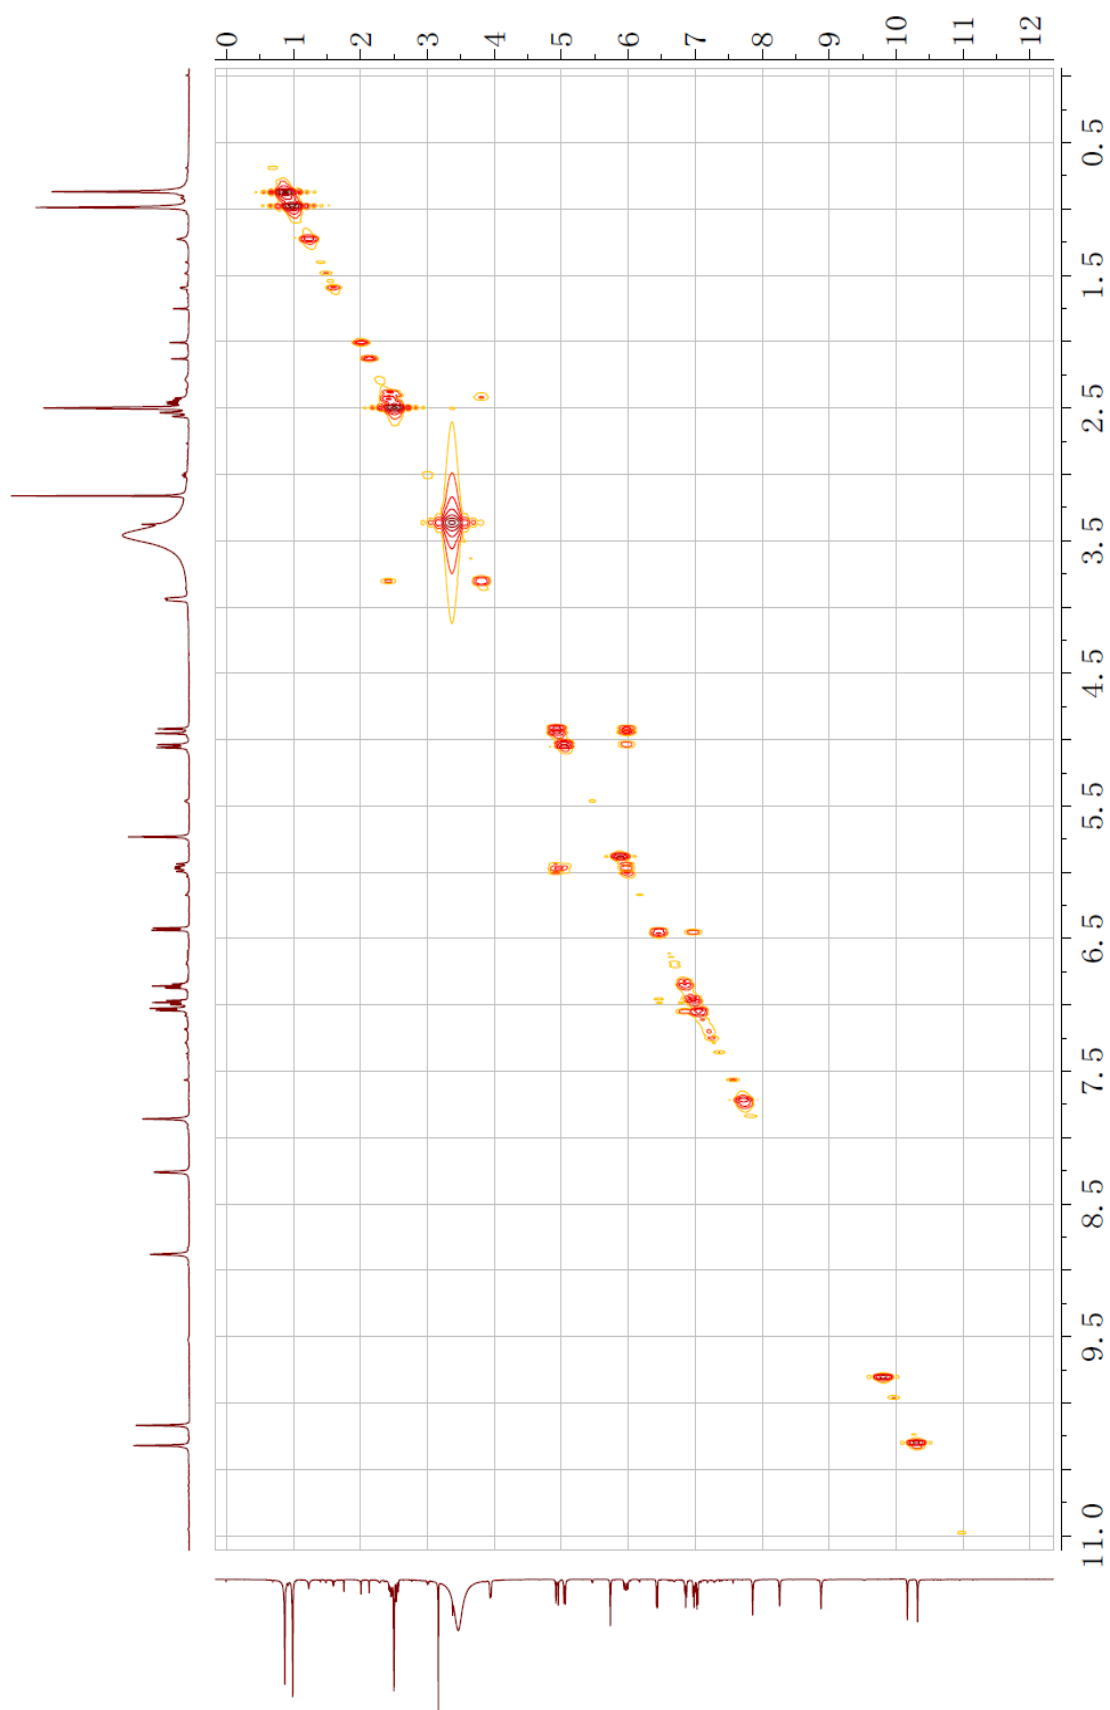

**Figure S33.** The HMBC spectrum of penilline B (3) in DMSO- $d_6$

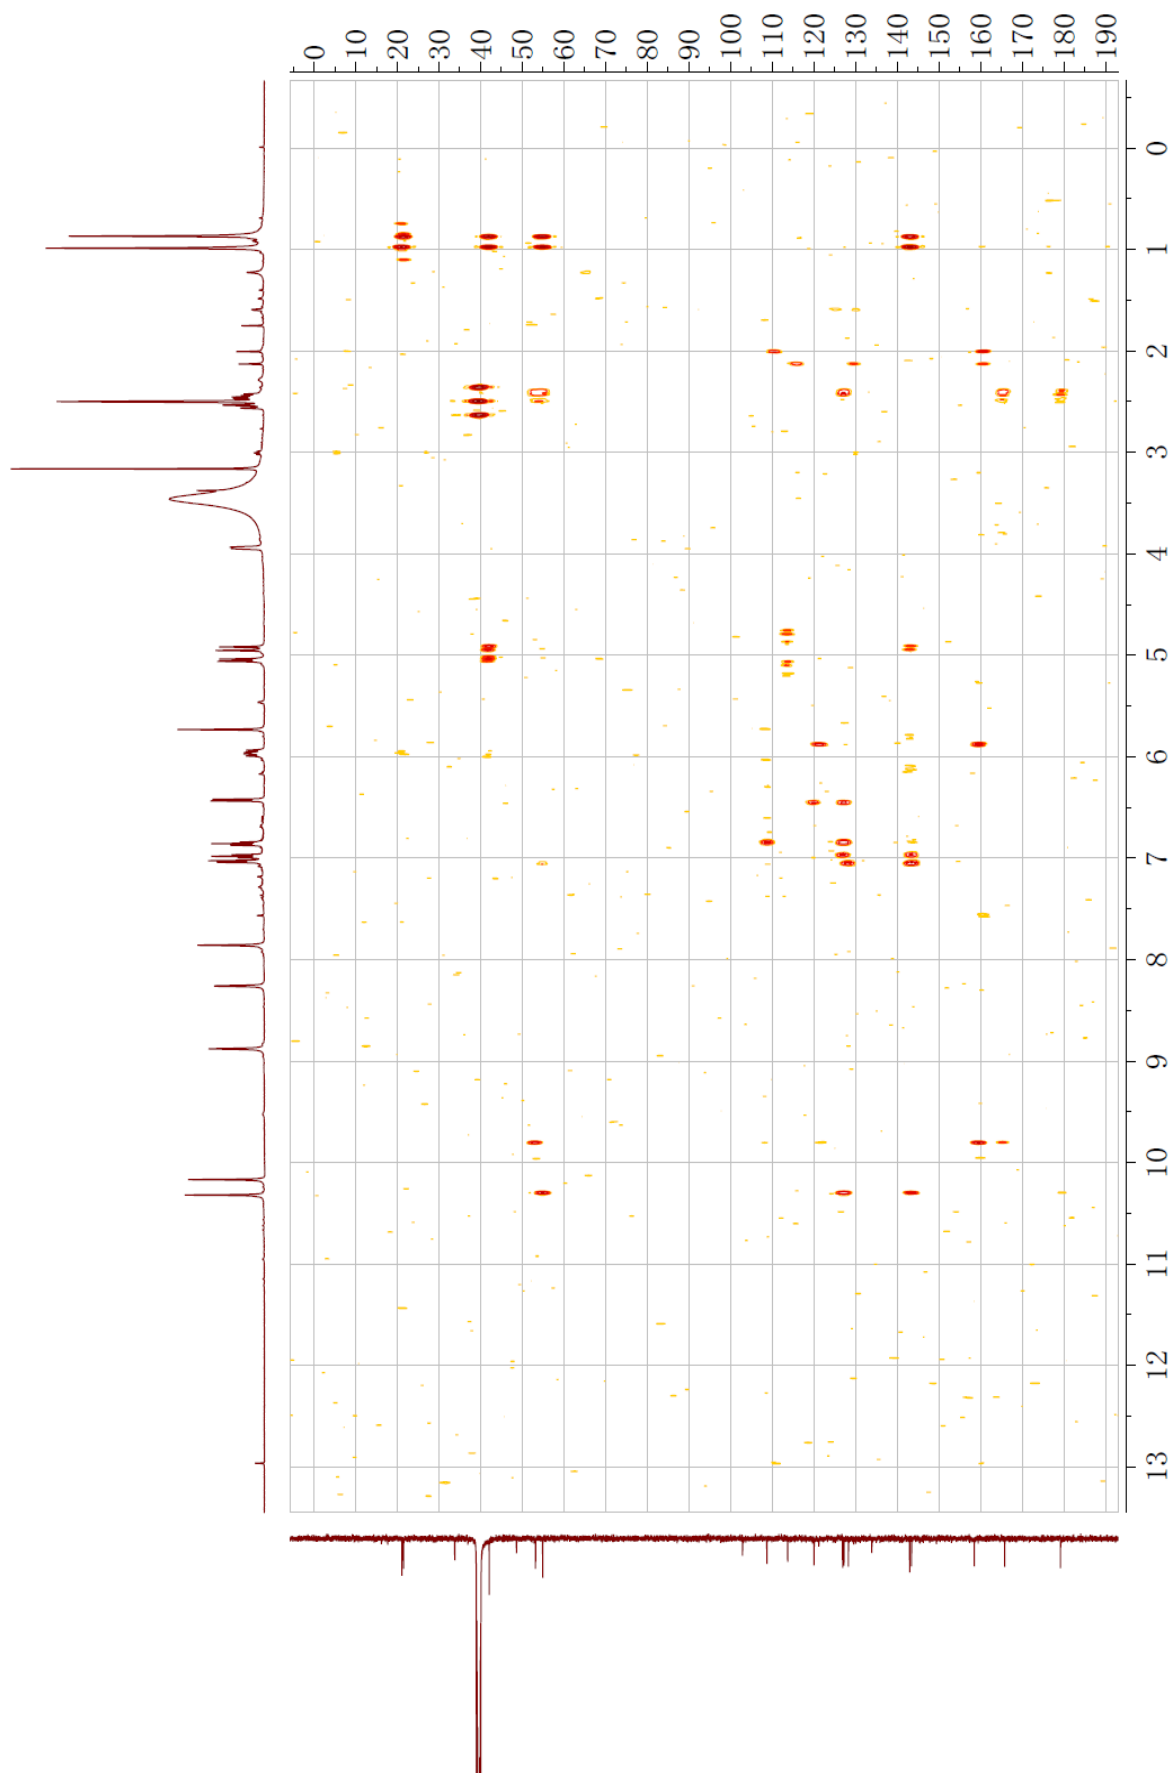

Figure S34. The NOESY spectrum of penilline B (3) in DMSO-*d*<sub>6</sub>

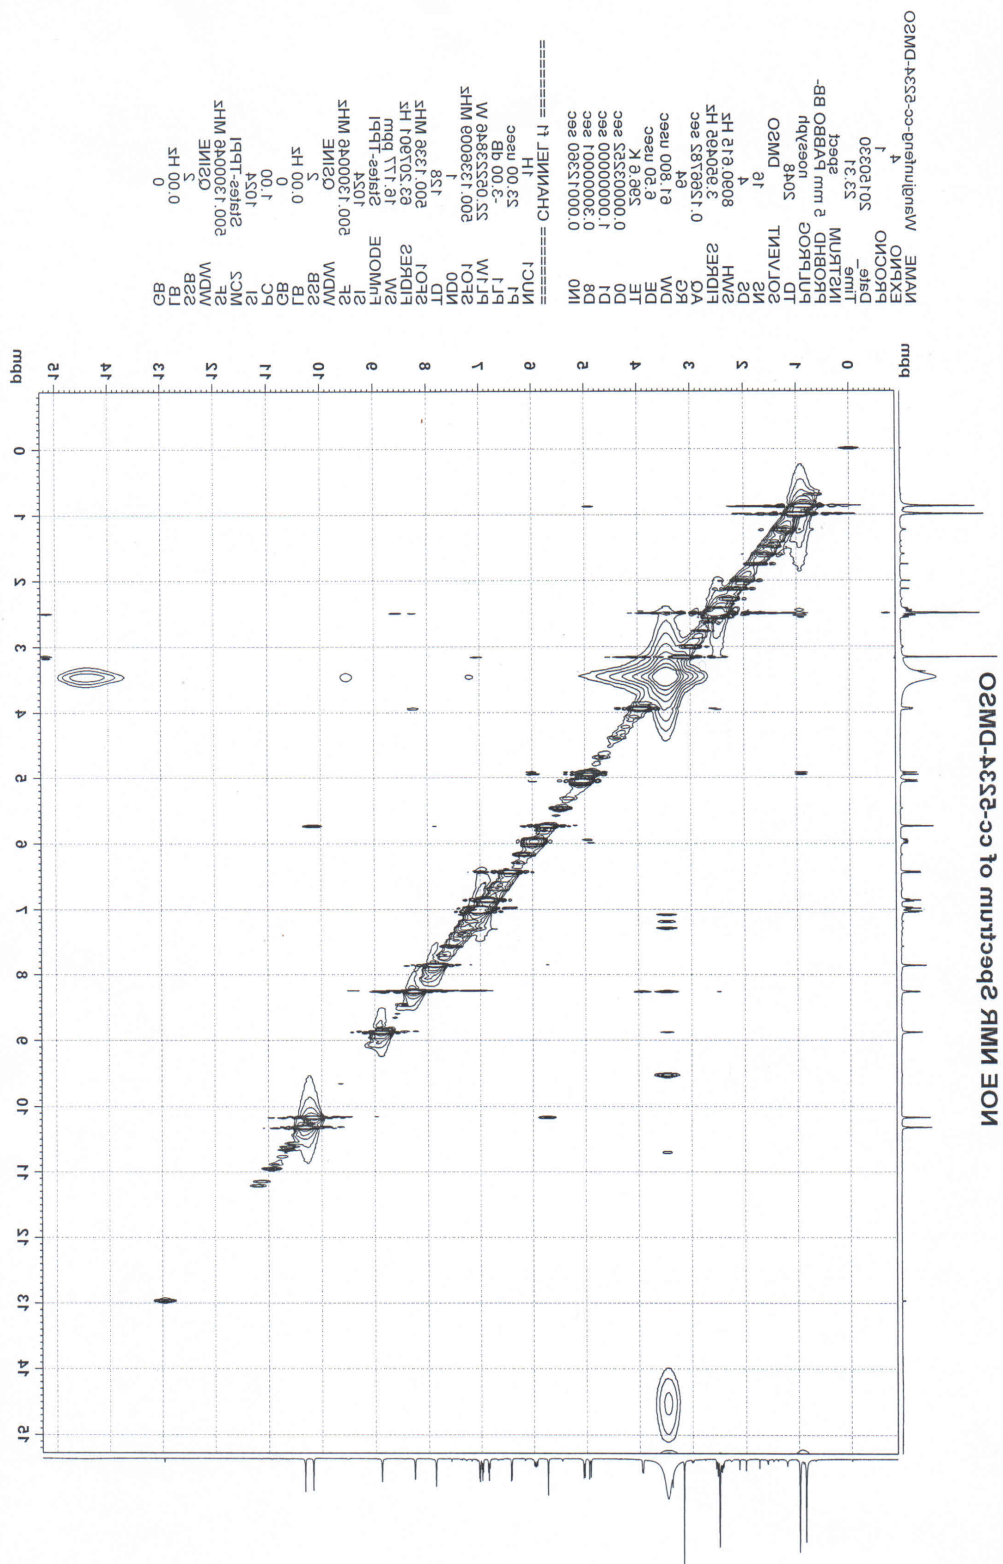

Figure S35. The HRESIMS spectrum of penilline B (3)

## Mass Spectrum SmartFormula Report

|                              |                                                  |
|------------------------------|--------------------------------------------------|
| <b>Analysis Info</b>         |                                                  |
| Analysis Name                | D:\Data\Ms\data\201503\wangjunfeng_CC-5234_pos.d |
| Method                       | POS_100-2000_Direct Infusion.m                   |
| Sample Name                  | SCSIO                                            |
| Comment                      |                                                  |
| Acquisition Date             | 3/30/2015 9:30:54 AM                             |
| Operator                     | SCSIO                                            |
| Instrument / Ser#            | maXis 29                                         |
| <b>Acquisition Parameter</b> |                                                  |
| Source Type                  | ESI                                              |
| Focus                        | Not active                                       |
| Scan Begin                   | 100 m/z                                          |
| Scan End                     | 2000 m/z                                         |
| Ion Polarity                 | Positive                                         |
| Set Capillary                | 4500 V                                           |
| Set End Plate Offset         | -500 V                                           |
| Set Collision Cell RF        | 2000.0 Vpp                                       |
| Set Nebulizer                | 0.3 Bar                                          |
| Set Dry Heater               | 180 °C                                           |
| Set Dry Gas                  | 4.0 l/min                                        |
| Set Divert Valve             | Waste                                            |

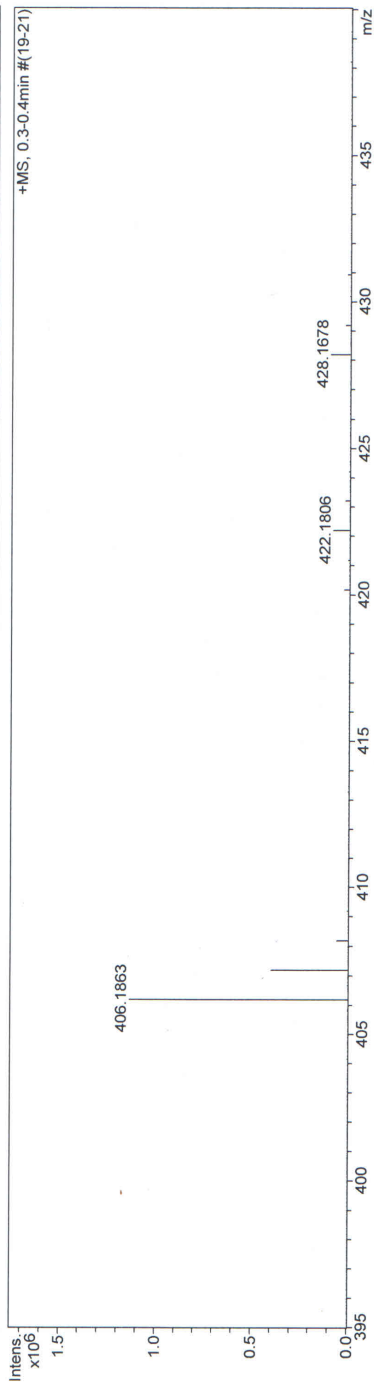

| Meas. m/z | # | Formula                                                         | Score  | m/z      | err [mDa] | err [ppm] | mSigma | rb   | e <sup>-</sup> | Conf | N-Rule |
|-----------|---|-----------------------------------------------------------------|--------|----------|-----------|-----------|--------|------|----------------|------|--------|
| 406.1863  | 1 | C <sub>22</sub> H <sub>24</sub> N <sub>5</sub> O <sub>3</sub>   | 100.00 | 406.1874 | 1.1       | 2.7       | 54.8   | 13.5 | even           |      | ok     |
| 428.1678  | 1 | C <sub>22</sub> H <sub>23</sub> N <sub>5</sub> NaO <sub>3</sub> | 100.00 | 428.1693 | 1.5       | 3.4       | 6.8    | 13.5 | even           |      | ok     |

Figure S36. The UV spectrum of penilline B (3)

# 光谱峰值检测报告

2015-04-30 15:29:46

数据集: CC-5234 - RawData

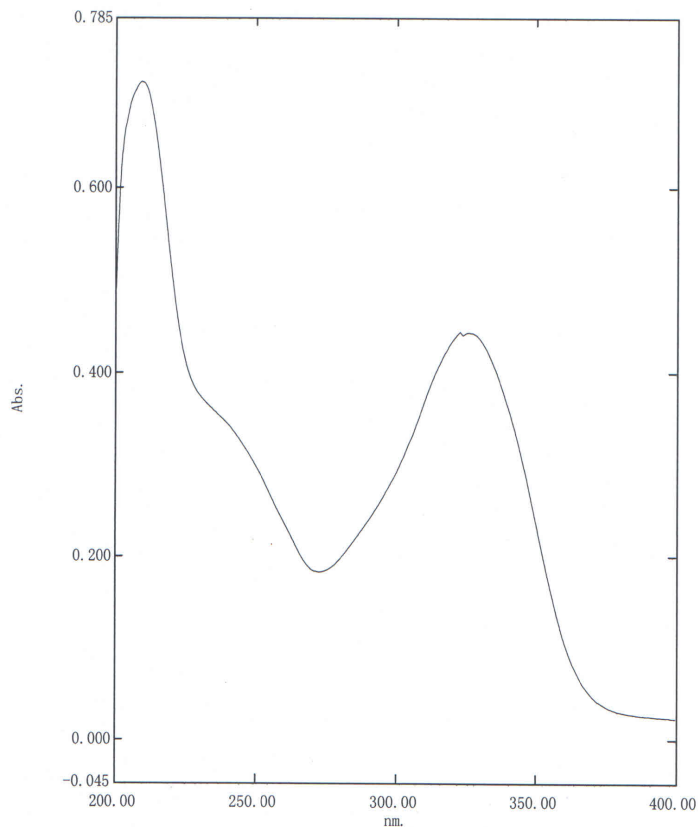

[测定属性]  
 波长范围 (nm.): 200.00 到 400.00  
 扫描速度: 中速  
 采样间隔: 0.2  
 自动采样间隔: 启用  
 扫描模式: 单个

[仪器属性]  
 仪器类型: UV-2600 系列  
 测定方式: 吸收值  
 狭缝宽: 2.0  
 积分时间: 0.1 秒  
 光源转换波长: 323.0 nm  
 检测器单元: 直接  
 S/R 转换: 标准  
 阶梯校正: OFF

[附件属性]  
 附件: 无

[数据处理参数]  
 阈值: 0.0100000  
 点: 4  
 内插: 停用  
 平均: 停用

[样品准备属性]  
 重量:  
 体积:  
 稀释:  
 光程长:  
 附加信息:

| No. | P/V | 波长 (nm) | 吸收值   | 描述 |
|-----|-----|---------|-------|----|
| 1   | ①   | 325.80  | 0.444 |    |
| 2   | ②   | 209.20  | 0.716 |    |
| 3   | ③   | 272.60  | 0.183 |    |
